# Supplementary material for: Investigation of the Fuzzy Complex between RSV Nucleoprotein and Phosphoprotein to Optimize an Inhibition Assay by Fluorescence Polarization
Source: MDPI journal article supplement (doi:10.3390/ijms24010569), 2022-12-29
Supplement: s1 [file s1]

## Supplementary Information

### Investigation of the fuzzy complex between RSV nucleoprotein and phosphoprotein to optimize an inhibition assay by fluorescence polarization

Silva Khodjoyan<sup>1</sup>, Deborha Morissette<sup>1</sup>, Fortune Hontonnou<sup>2</sup>, Luis Checa Ruano<sup>3</sup>, Charles-Adrien Richard<sup>2</sup>, Olivier Sperandio<sup>3</sup>, Jean-François Eleouët<sup>2</sup>, Marie Galloux<sup>2</sup>, Philippe Durand<sup>1</sup>, Stéphanie Deville-Foillard<sup>1</sup>, Christina Sizun<sup>1\*</sup>

Content: Pages

#### NMR Spectra

|                                                                                                        |           |
|--------------------------------------------------------------------------------------------------------|-----------|
| <b>Figure S1.</b> <sup>1</sup> H NMR spectrum of <b>5</b> (699Mz, CDCl <sub>3</sub> ).                 | <b>S2</b> |
| <b>Figure S2.</b> <sup>13</sup> C NMR spectrum of <b>5</b> (176 Mz, CDCl <sub>3</sub> ).               | <b>S3</b> |
| <b>Figure S3.</b> <sup>11</sup> B NMR spectrum of <b>5</b> (176 Mz, CD <sub>2</sub> Cl <sub>2</sub> ). | <b>S3</b> |
| <b>Figure S4.</b> <sup>1</sup> H NMR spectrum of <b>6</b> (699Mz, DMSO, <i>d</i> <sub>6</sub> ).       | <b>S4</b> |
| <b>Figure S5.</b> <sup>13</sup> C NMR spectrum of <b>6</b> (176 Mz, DMSO, <i>d</i> <sub>6</sub> ).     | <b>S4</b> |
| <b>Figure S6.</b> <sup>11</sup> B NMR spectrum of <b>6</b> (176 Mz, CD <sub>2</sub> Cl <sub>2</sub> ). | <b>S5</b> |

#### UPLC Traces

|                                                                  |            |
|------------------------------------------------------------------|------------|
| <b>Figure S7.</b> UPLC analysis of <b>P</b> <sub>3</sub> .       | <b>S6</b>  |
| <b>Figure S8.</b> UPLC analysis of <b>P</b> <sub>4</sub> .       | <b>S7</b>  |
| <b>Figure S9.</b> UPLC analysis of <b>P</b> <sub>5E</sub> .      | <b>S8</b>  |
| <b>Figure S10.</b> UPLC analysis of <b>P</b> <sub>7E</sub> .     | <b>S9</b>  |
| <b>Figure S11.</b> UPLC analysis of <b>P</b> <sub>9E</sub> .     | <b>S10</b> |
| <b>Figure S12.</b> UPLC analysis of <b>P</b> <sub>11E</sub> .    | <b>S11</b> |
| <b>Figure S13.</b> UPLC analysis of <b>F</b> <sub>3</sub> .      | <b>S12</b> |
| <b>Figure S14.</b> UPLC analysis of <b>F</b> <sub>4</sub> .      | <b>S13</b> |
| <b>Figure S15.</b> UPLC analysis of <b>F</b> <sub>5E</sub> .     | <b>S14</b> |
| <b>Figure S16.</b> UPLC analysis of <b>F</b> <sub>7E</sub> .     | <b>S15</b> |
| <b>Figure S17.</b> UPLC analysis of <b>F</b> <sub>9E</sub> .     | <b>S16</b> |
| <b>Figure S18.</b> UPLC analysis of <b>F</b> <sub>11E</sub> .    | <b>S17</b> |
| <b>Figure S19.</b> UPLC analysis of <b>F</b> <sub>11SE</sub> .   | <b>S18</b> |
| <b>Figure S20.</b> UPLC analysis of <b>F</b> <sub>11SS</sub> .   | <b>S19</b> |
| <b>Figure S21.</b> UPLC analysis of <b>pF</b> <sub>11</sub> .    | <b>S20</b> |
| <b>Figure S22.</b> UPLC analysis of <b>BCN</b> <sub>5E</sub> .   | <b>S21</b> |
| <b>Figure S23.</b> UPLC analysis of <b>BCN</b> <sub>6E</sub> .   | <b>S22</b> |
| <b>Figure S24.</b> UPLC analysis of <b>BCN</b> <sub>7E</sub> .   | <b>S23</b> |
| <b>Figure S25.</b> UPLC analysis of <b>BCN</b> <sub>8E</sub> .   | <b>S24</b> |
| <b>Figure S26.</b> UPLC analysis of <b>BCN</b> <sub>9E</sub> .   | <b>S25</b> |
| <b>Figure S27.</b> UPLC analysis of <b>BCN</b> <sub>10EE</sub> . | <b>S26</b> |
| <b>Figure S28.</b> UPLC analysis of <b>BCN</b> <sub>11EE</sub> . | <b>S27</b> |
| <b>Figure S29.</b> UPLC analysis of <b>BCN</b> <sub>11SE</sub> . | <b>S28</b> |
| <b>Figure S30.</b> UPLC analysis of <b>Blank</b> .               | <b>S29</b> |

#### HPLC Traces

|                                                |            |
|------------------------------------------------|------------|
| <b>Figure S31.</b> HPLC analysis of <b>7</b> . | <b>S30</b> |
| <b>Figure S32.</b> HPLC analysis of <b>5</b> . | <b>S31</b> |

#### UV-Visible Absorption and fluorescence Spectra

|                                                                                                                                |            |
|--------------------------------------------------------------------------------------------------------------------------------|------------|
| <b>Figure S33.</b> UV-Visible absorption spectrum and fluorescence excitation/emission spectra of <b>BCN</b> <sub>10EE</sub> . | <b>S32</b> |
|--------------------------------------------------------------------------------------------------------------------------------|------------|

## NMR Spectra

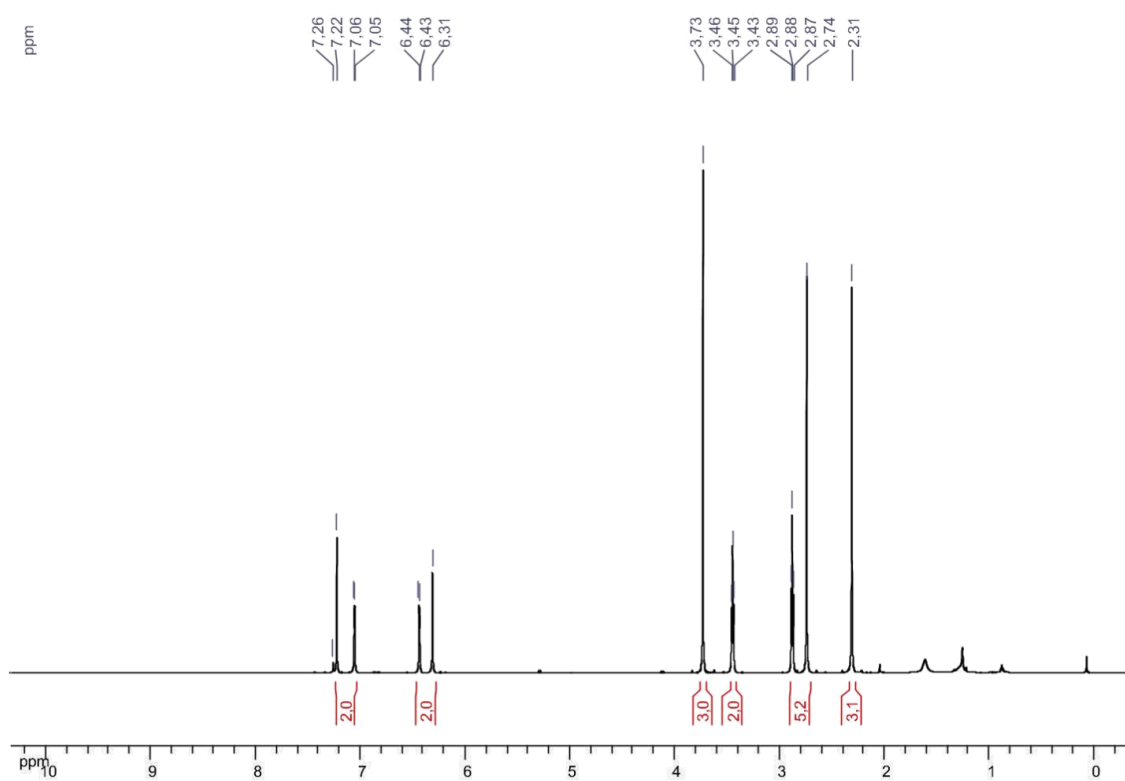

**Figure S1.** <sup>1</sup>H NMR spectrum of **5** (699Mz, CDCl<sub>3</sub>).

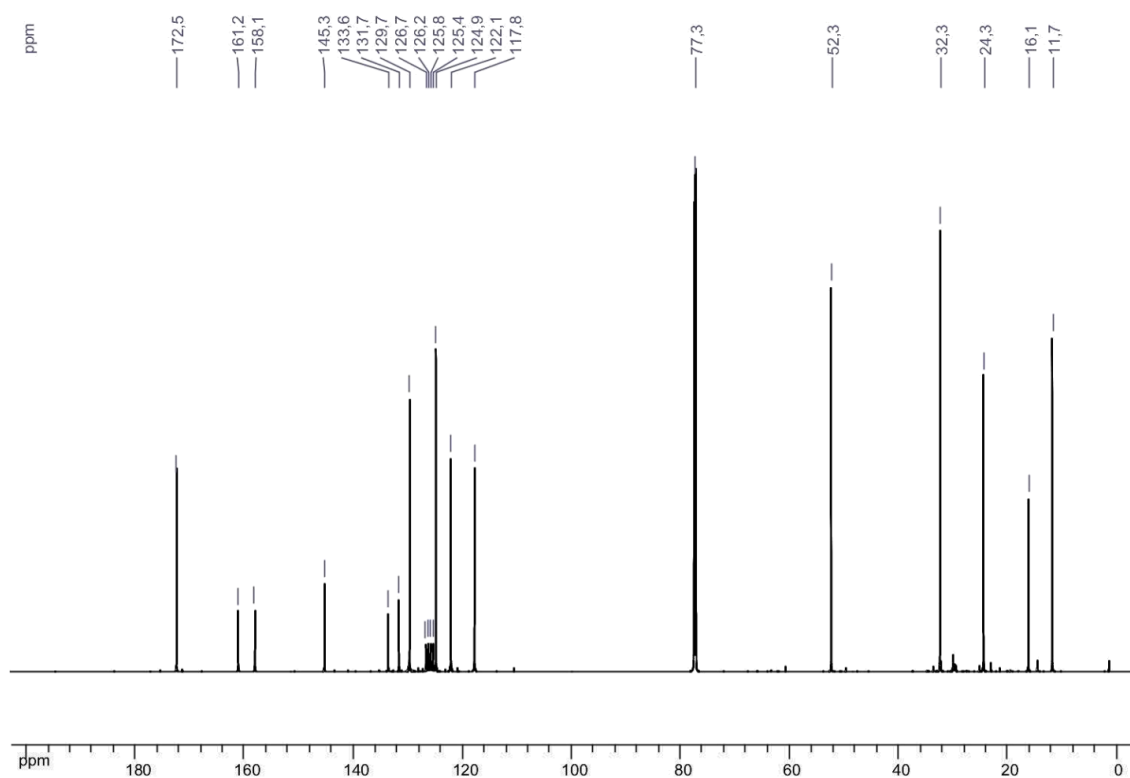

**Figure S2.** <sup>13</sup>C NMR spectrum of **5** (176 Mz, CDCl<sub>3</sub>).

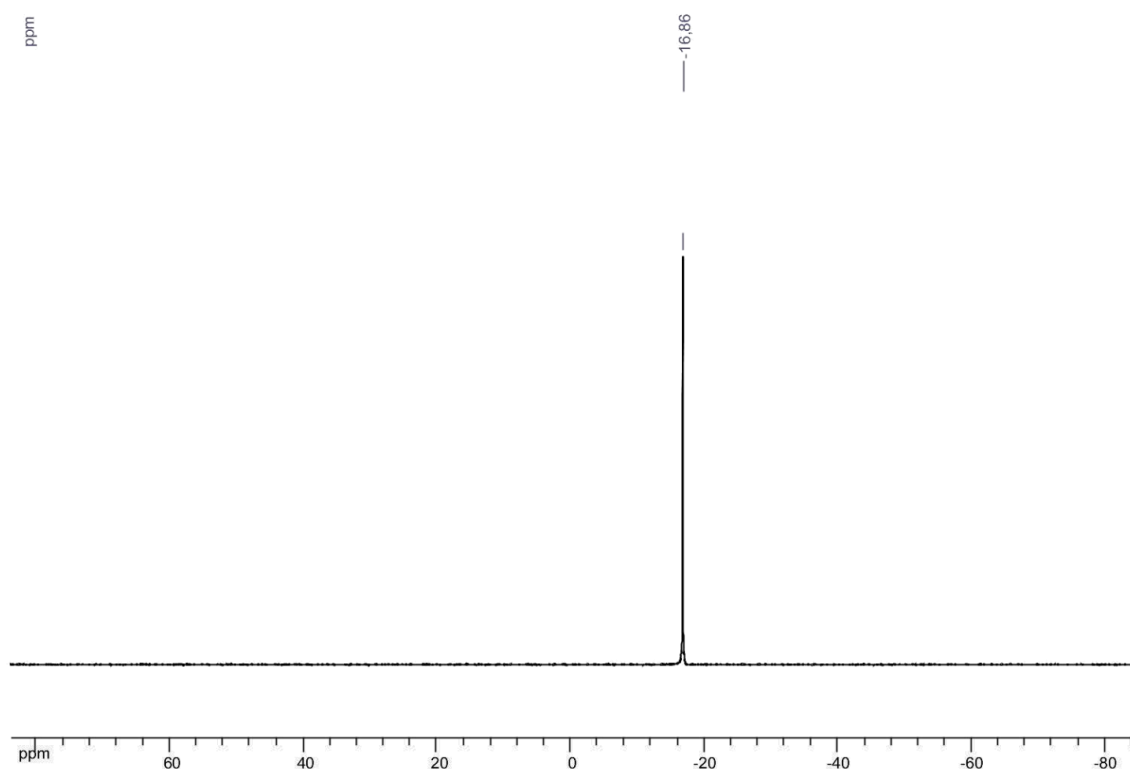

**Figure S3.** <sup>11</sup>B NMR spectrum of **5** (176 Mz, CD<sub>2</sub>Cl<sub>2</sub>).

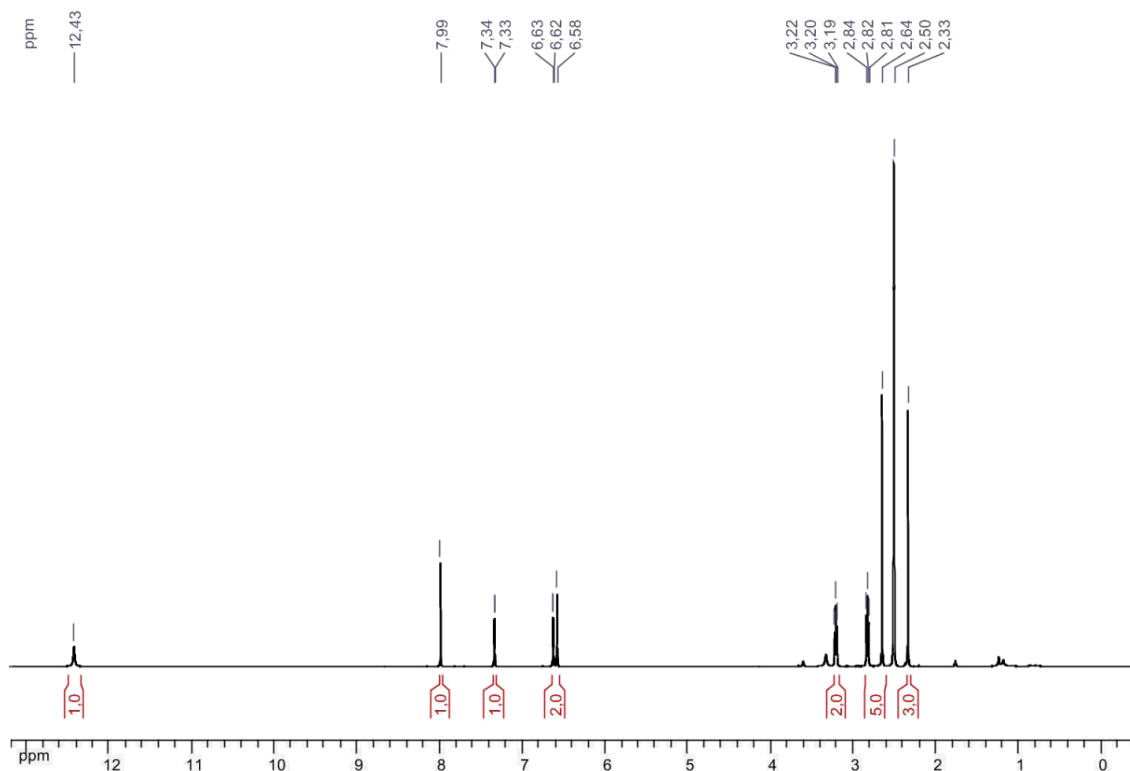

**Figure S4.** <sup>1</sup>H NMR spectrum of **6** (699Mz, DMSO, *d*<sub>6</sub>).

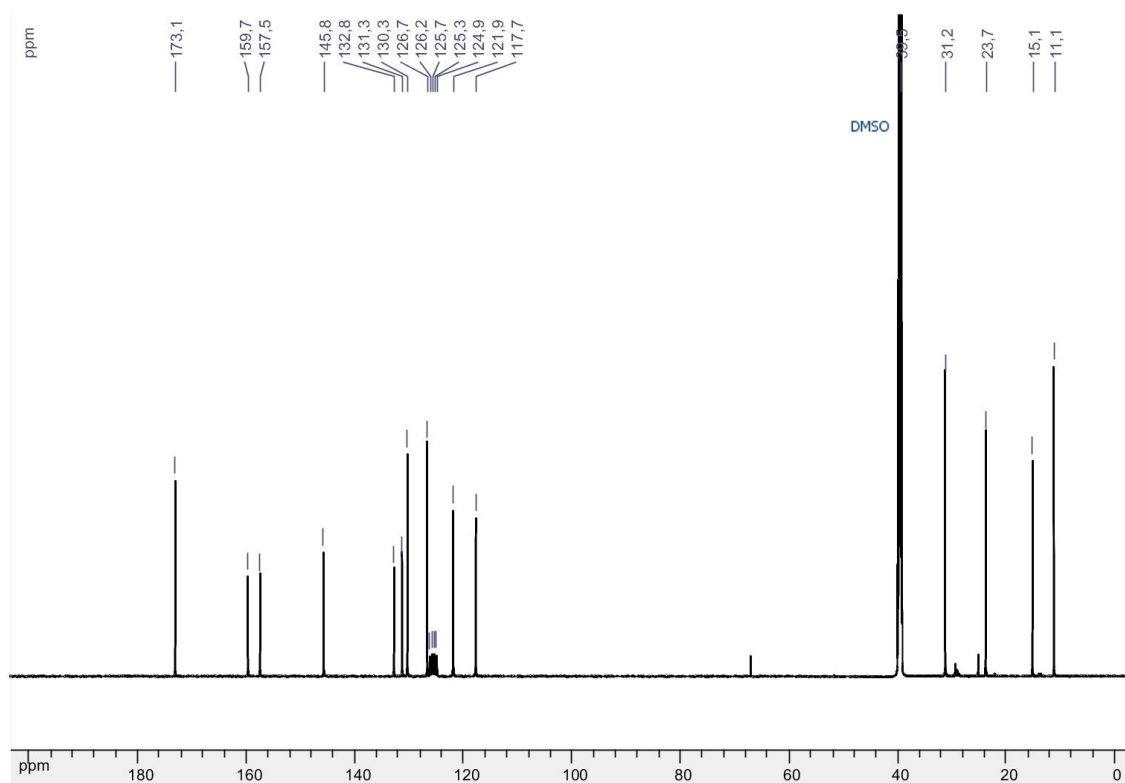

**Figure S5.** <sup>13</sup>C NMR spectrum of **6** (176 Mz, DMSO, *d*<sub>6</sub>).

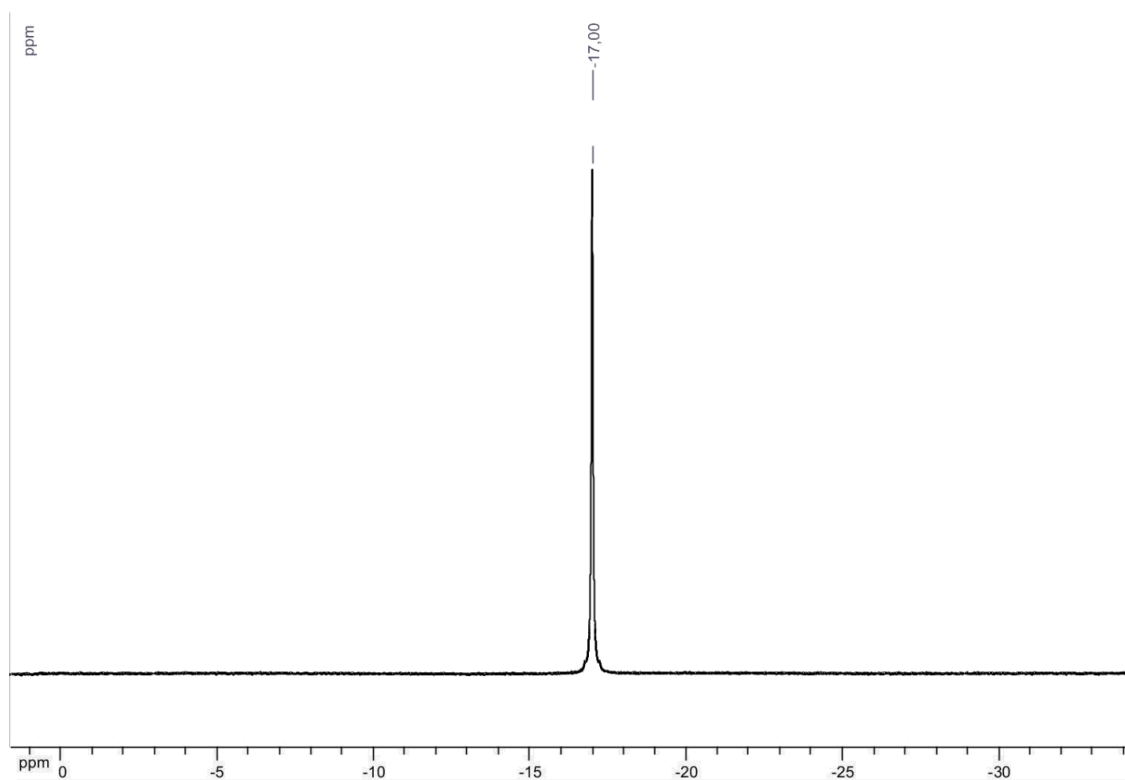

**Figure S6.**  $^{11}\text{B}$  NMR spectrum of **6** (176 Mz,  $\text{CD}_2\text{Cl}_2$ ).

## UPLC Traces

Sample name: **P<sub>3</sub>**

Column: BEH C18 2.1x50 mm 1.7  $\mu$ m

Solvent A: H<sub>2</sub>O+0.1% HCOOH

Solvent B: Acetonitrile +0,1% HCOOH

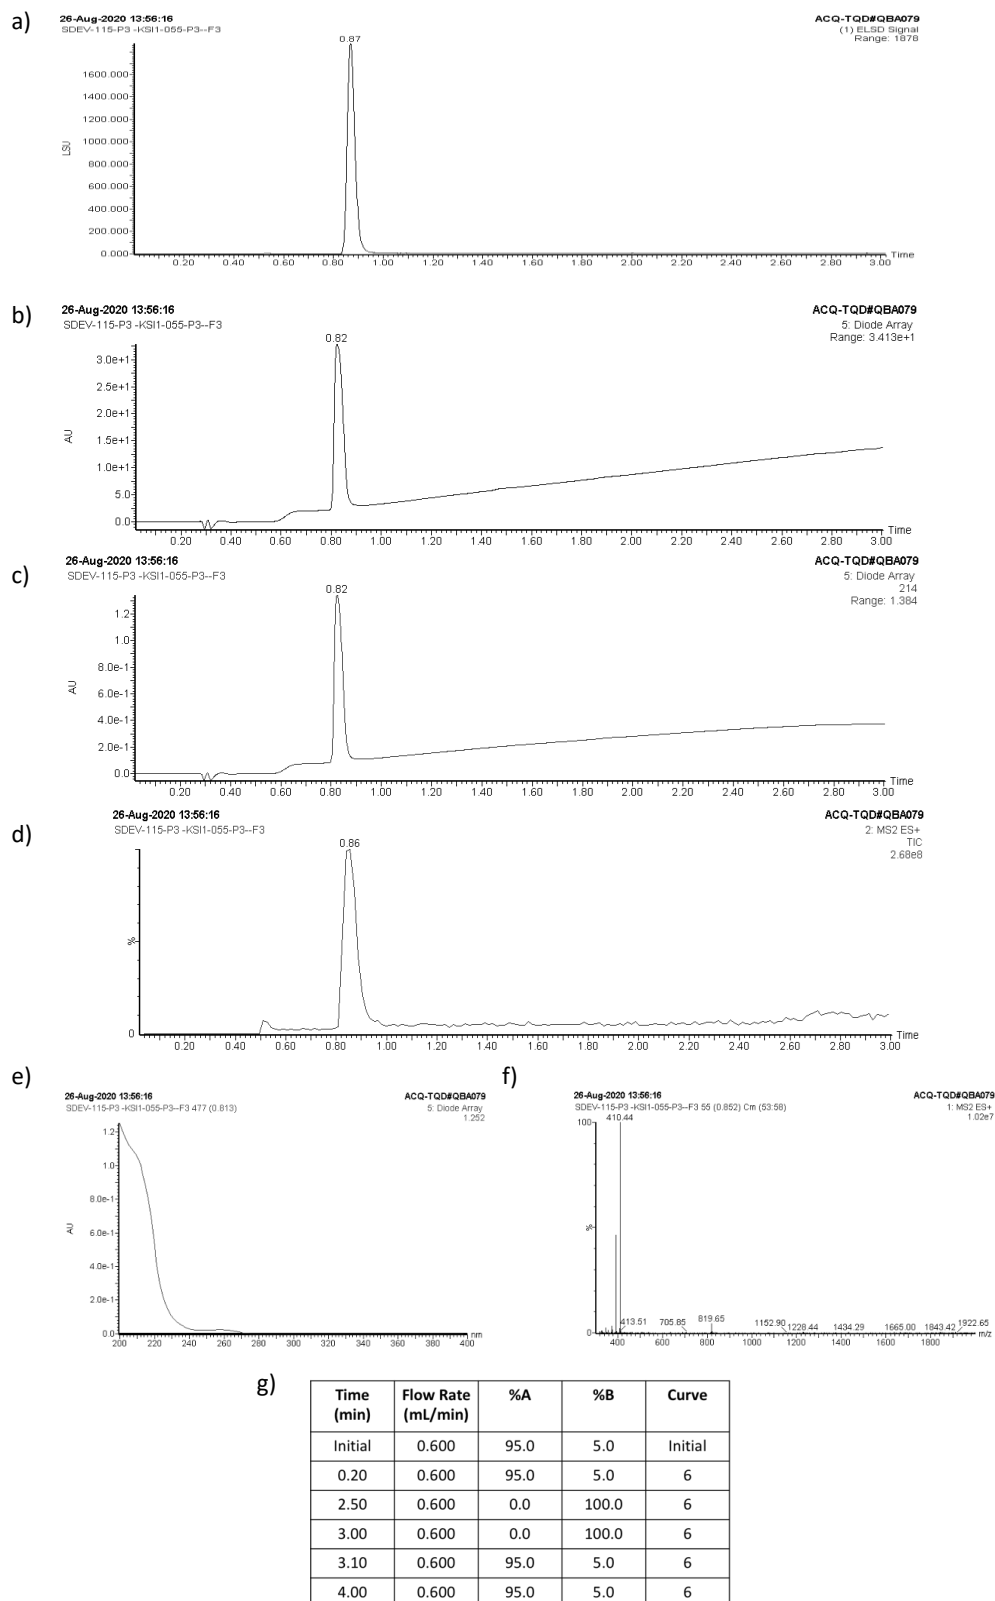

**Figure S7.** UPLC analysis of **P<sub>3</sub>**. a) ELSD detector, b) Photodiode array detector (absorbance maximum for each compound between 220–500), c) Photodiode array detector ( $\lambda$ :214nm), d) Mass detector (ESI<sup>+</sup>), e) absorption spectra of the compound, f) Mass spectra of the compound, g) gradient.

Sample name: **P<sub>4</sub>**  
 Column: BEH C18 2.1x50 mm 1.7 µm

Solvent A: H<sub>2</sub>O+0.1% HCOOH  
 Solvent B: Acetonitrile +0,1% HCOOH

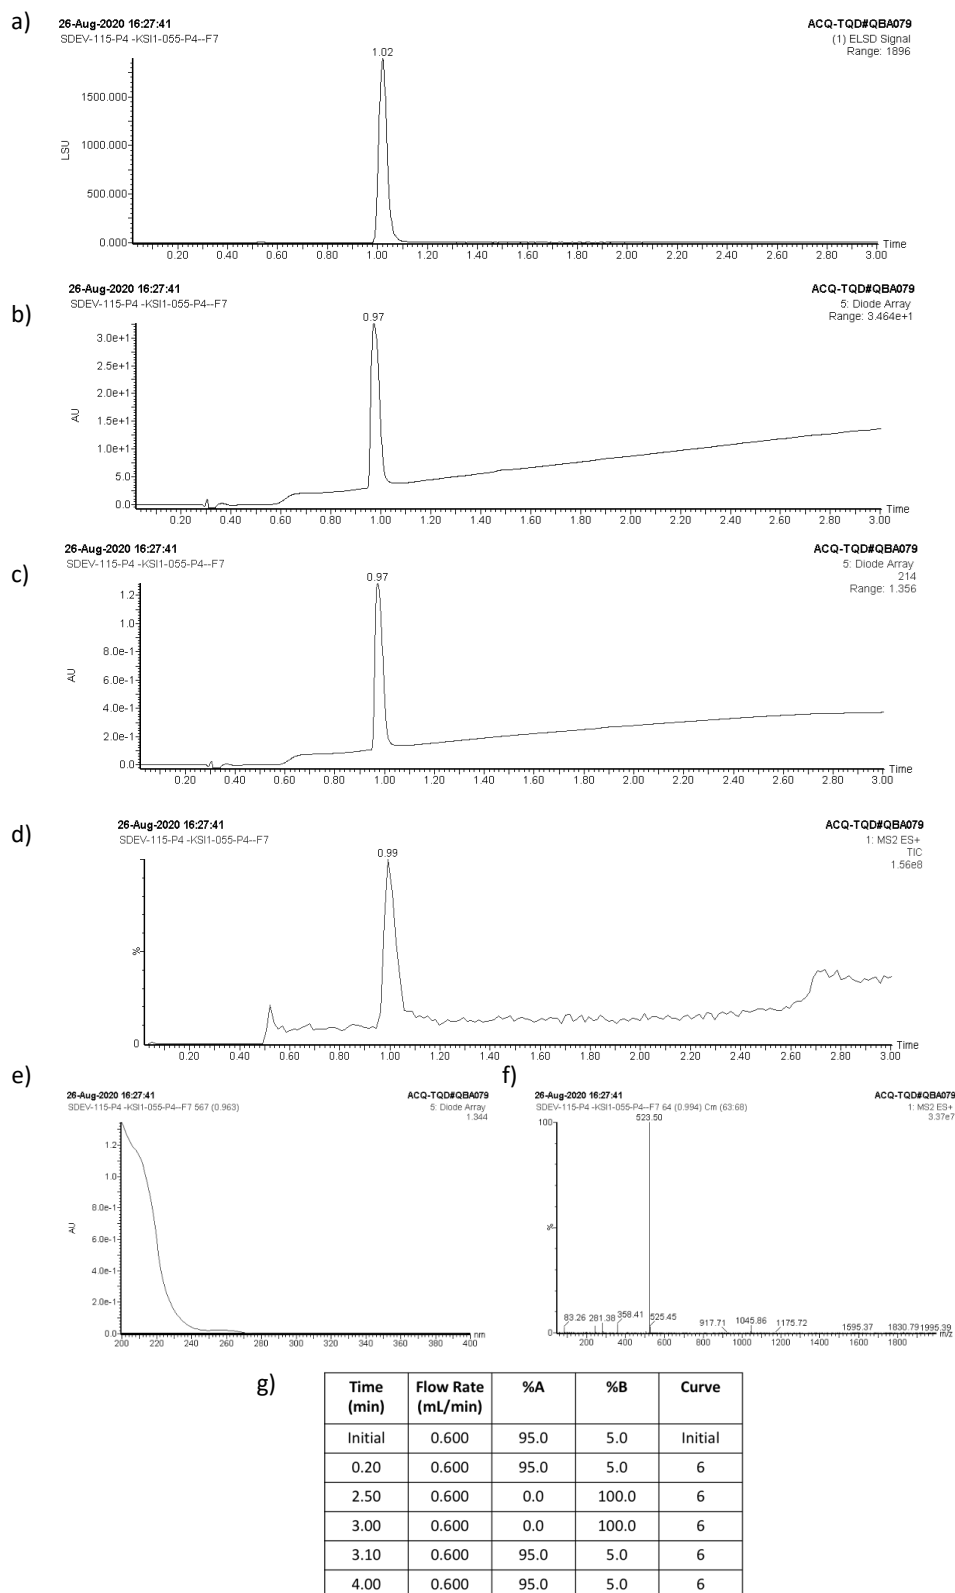

**Figure S8.** UPLC analysis of **P<sub>4</sub>**. a) ELSD detector, b) Photodiode array detector (absorbance maximum for each compound between 220–500), c) Photodiode array detector (λ:214nm), d) Mass detector (ESI<sup>+</sup>), e) absorption spectra of the compound, f) Mass spectra of the compound, g) gradient.

Sample name: **P<sub>5E</sub>**  
 Column: BEH C18 2.1x50 mm 1.7  $\mu$ m

Solvent A: H<sub>2</sub>O+0.1% HCOOH  
 Solvent B: Acetonitrile +0,1% HCOOH

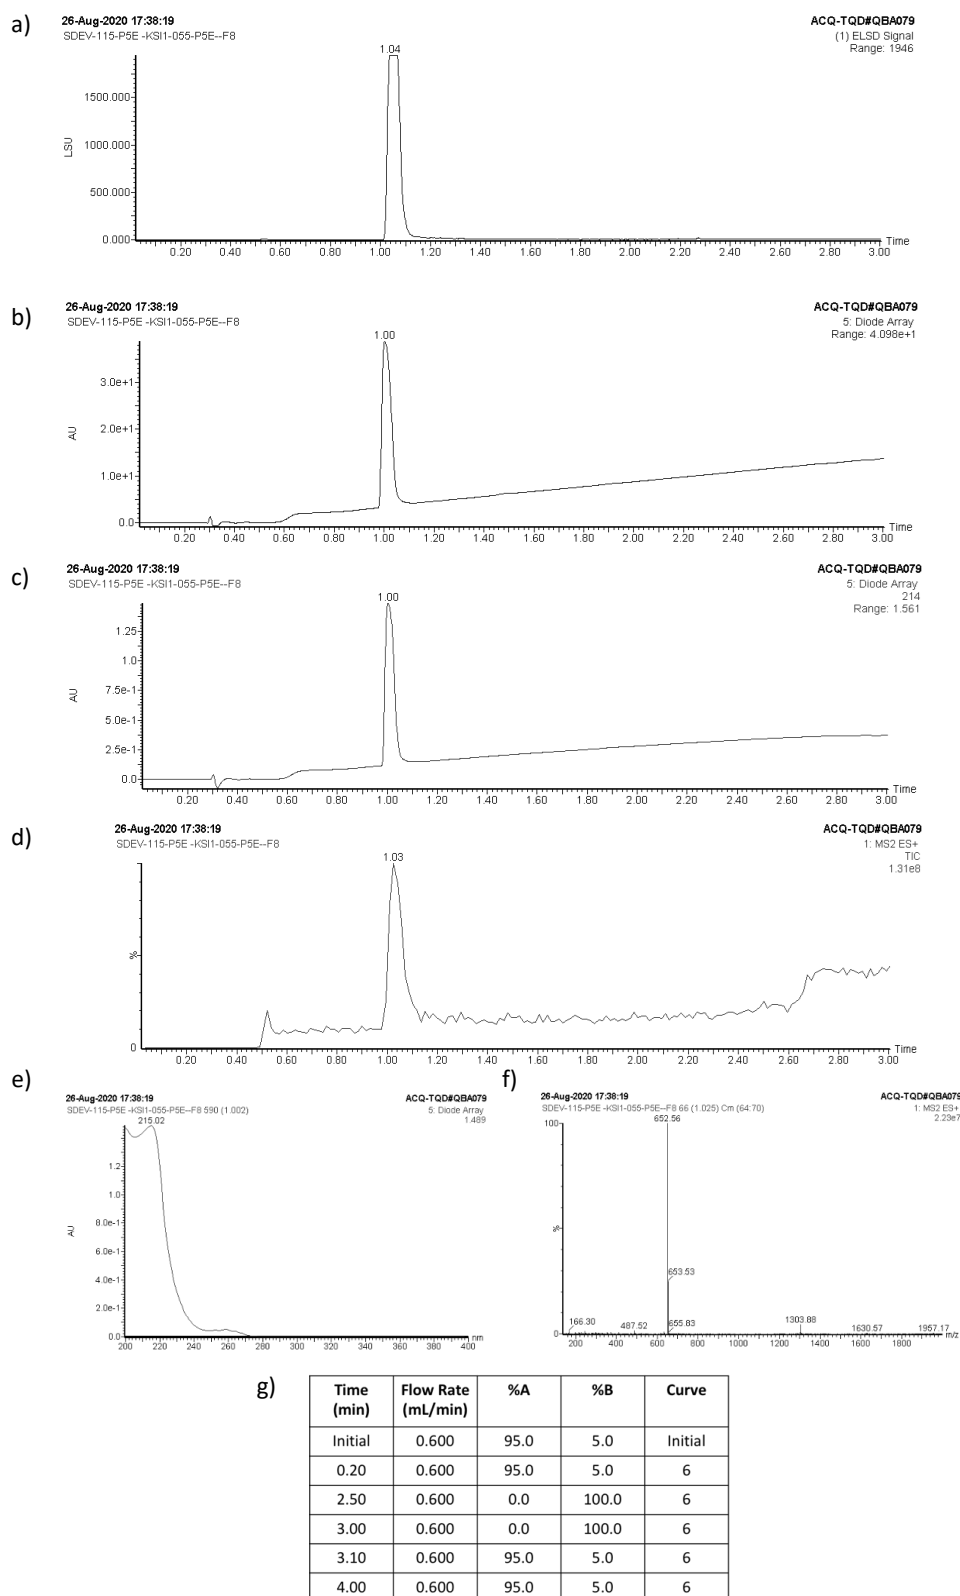

**Figure S9.** UPLC analysis of **P<sub>5E</sub>**. a) ELSD detector, b) Photodiode array detector (absorbance maximum for each compound between 220–500), c) Photodiode array detector ( $\lambda$ :214nm), d) Mass detector (ESI<sup>+</sup>), e) absorption spectra of the compound, f) Mass spectra of the compound, g) gradient.



Sample name: **P<sub>7E</sub>**  
 Column: BEH C18 2.1x50 mm 1.7  $\mu$ m

Solvent A: H<sub>2</sub>O+0.1% HCOOH  
 Solvent B: Acetonitrile +0,1% HCOOH

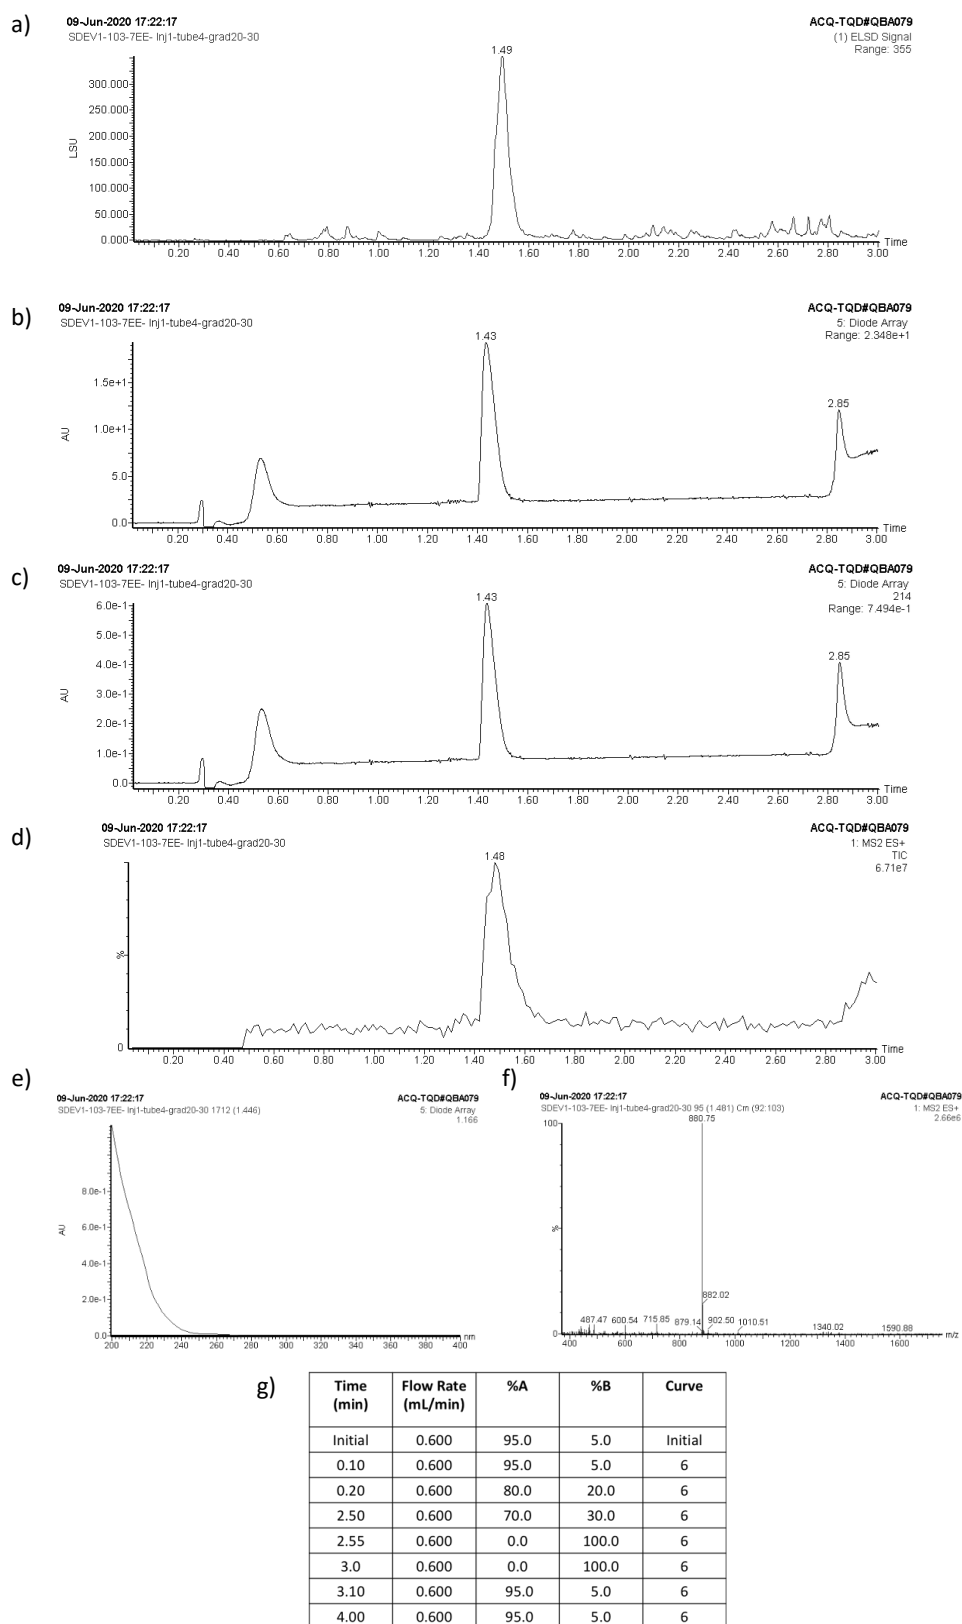

**Figure S10.** UPLC analysis of **P<sub>7E</sub>**. a) ELSD detector, b) Photodiode array detector (absorbance maximum for each compound between 220–500), c) Photodiode array detector ( $\lambda$ :214nm), d) Mass detector (ESI<sup>+</sup>), e) absorption spectra of the compound, f) Mass spectra of the compound, g) gradient.

Sample name: **P<sub>7E</sub>**  
 Column: BEH C18 2.1x50 mm 1.7  $\mu$ m

Solvent A: H<sub>2</sub>O+0.1% HCOOH  
 Solvent B: Acetonitrile +0,1% HCOOH

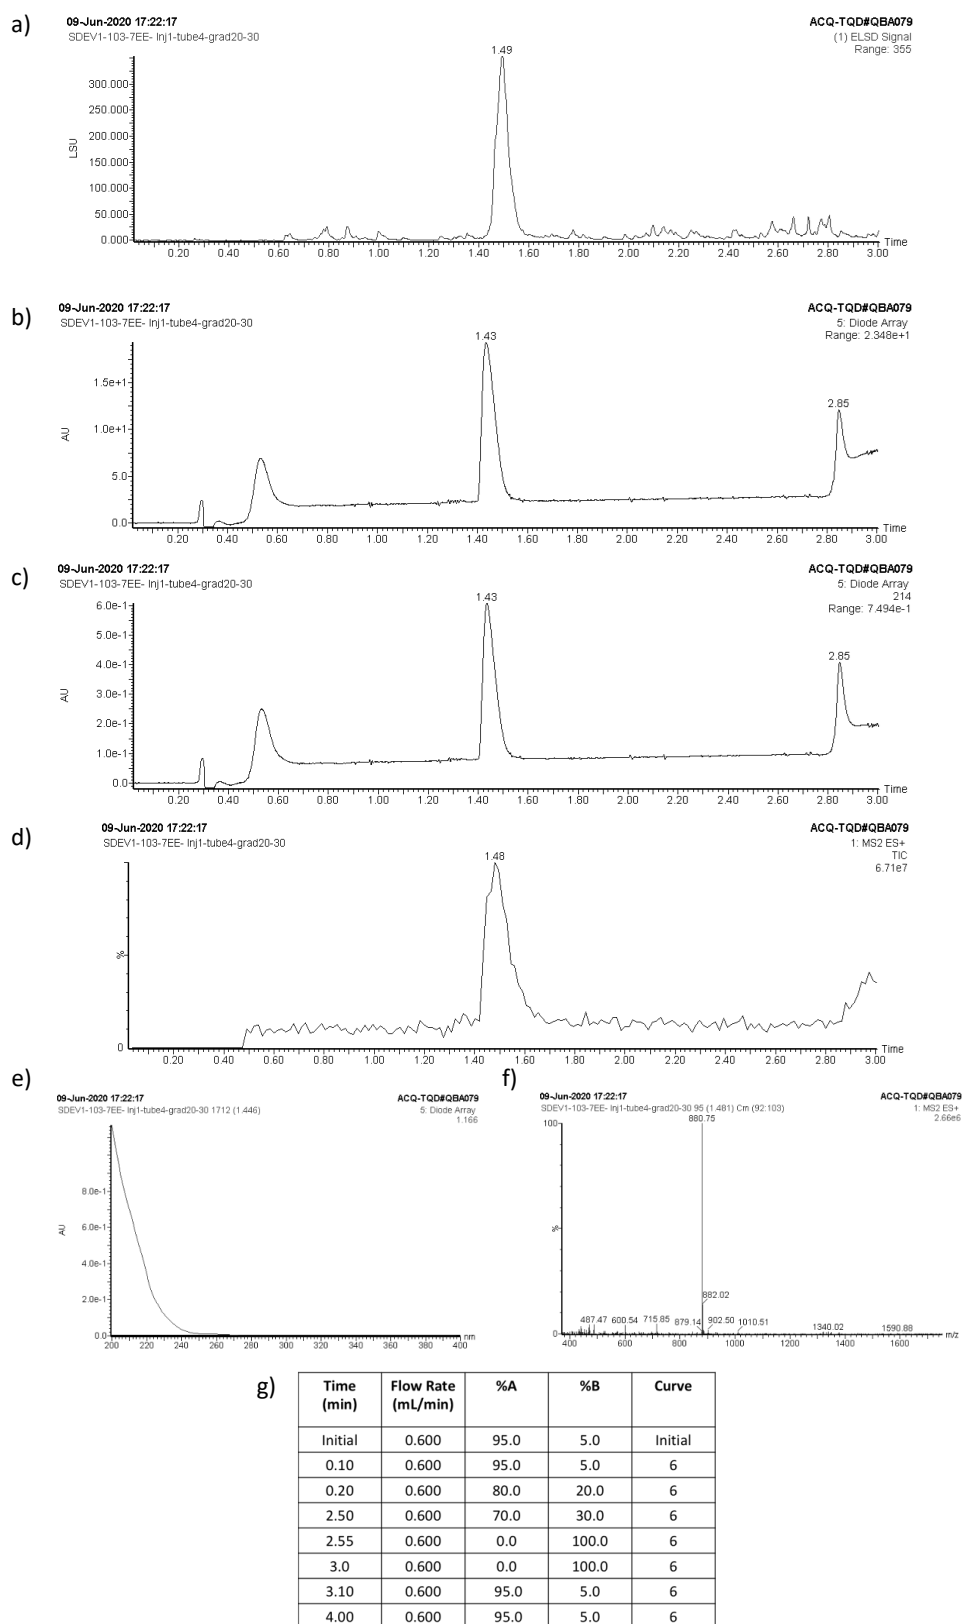

**Figure S11.** UPLC analysis of **P<sub>9E</sub>**. a) ELSD detector, b) Photodiode array detector (absorbance maximum for each compound between 220–500), c) Photodiode array detector ( $\lambda$ :214nm), d) Mass detector (ESI<sup>+</sup>), e) absorption spectra of the compound, f) Mass spectra of the compound, g) gradient.

Sample name: **P<sub>11E</sub>**  
 Column: BEH C18 2.1x50 mm 1.7  $\mu$ m

Solvent A: H<sub>2</sub>O+0.1% HCOOH  
 Solvent B: Acetonitrile +0,1% HCOOH

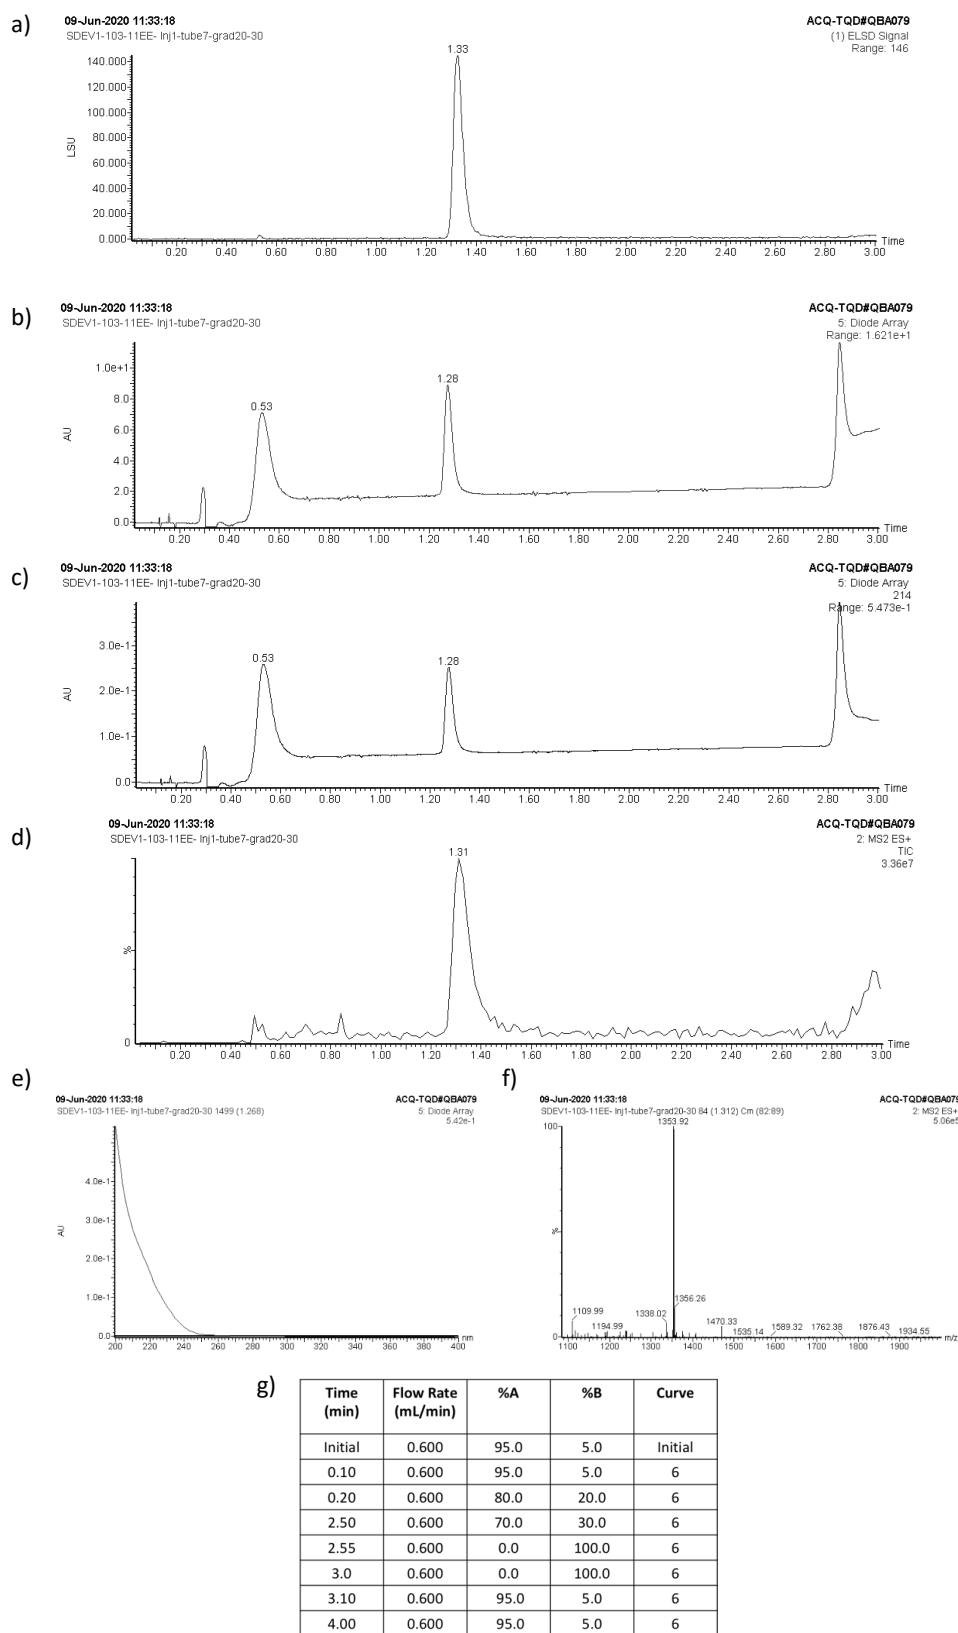

**Figure S12.** UPLC analysis of **P<sub>11E</sub>**. a) ELSD detector, b) Photodiode array detector (absorbance maximum for each compound between 220–500), c) Photodiode array detector ( $\lambda$ :214nm), d) Mass detector (ESI<sup>+</sup>), e) absorption spectra of the compound, f) Mass spectra of the compound, g) gradient.

Sample name: **F<sub>3</sub>**  
 Column: BEH C18 2.1x50 mm 1.7  $\mu$ m

Solvent A: H<sub>2</sub>O+0.1% HCOOH  
 Solvent B: Acetonitrile +0,1% HCOOH

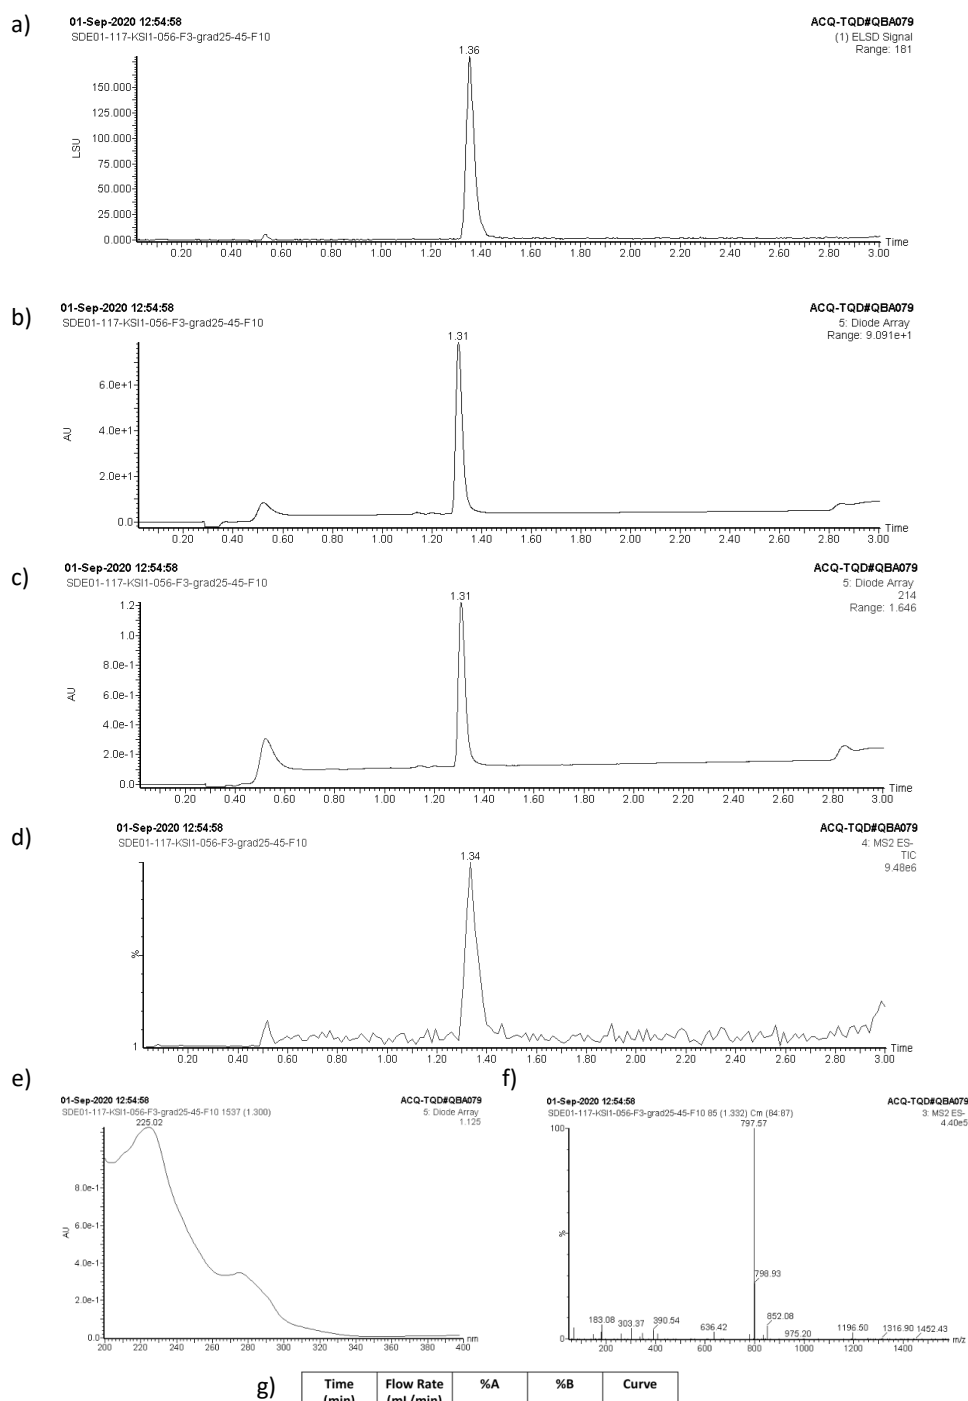

**Figure S13.** UPLC analysis of **F<sub>3</sub>**. a) ELSD detector, b) Photodiode array detector (absorbance maximum for each compound between 220–500), c) Photodiode array detector ( $\lambda$ :214nm), d) Mass detector (ESI<sup>-</sup>), e) absorption spectra of the compound, f) Mass spectra of the compound, g) gradient.

Sample name: **F4**  
 Column: BEH C18 2.1x50 mm 1.7  $\mu$ m

Solvent A: H<sub>2</sub>O+0.1% HCOOH  
 Solvent B: Acetonitrile +0,1% HCOOH

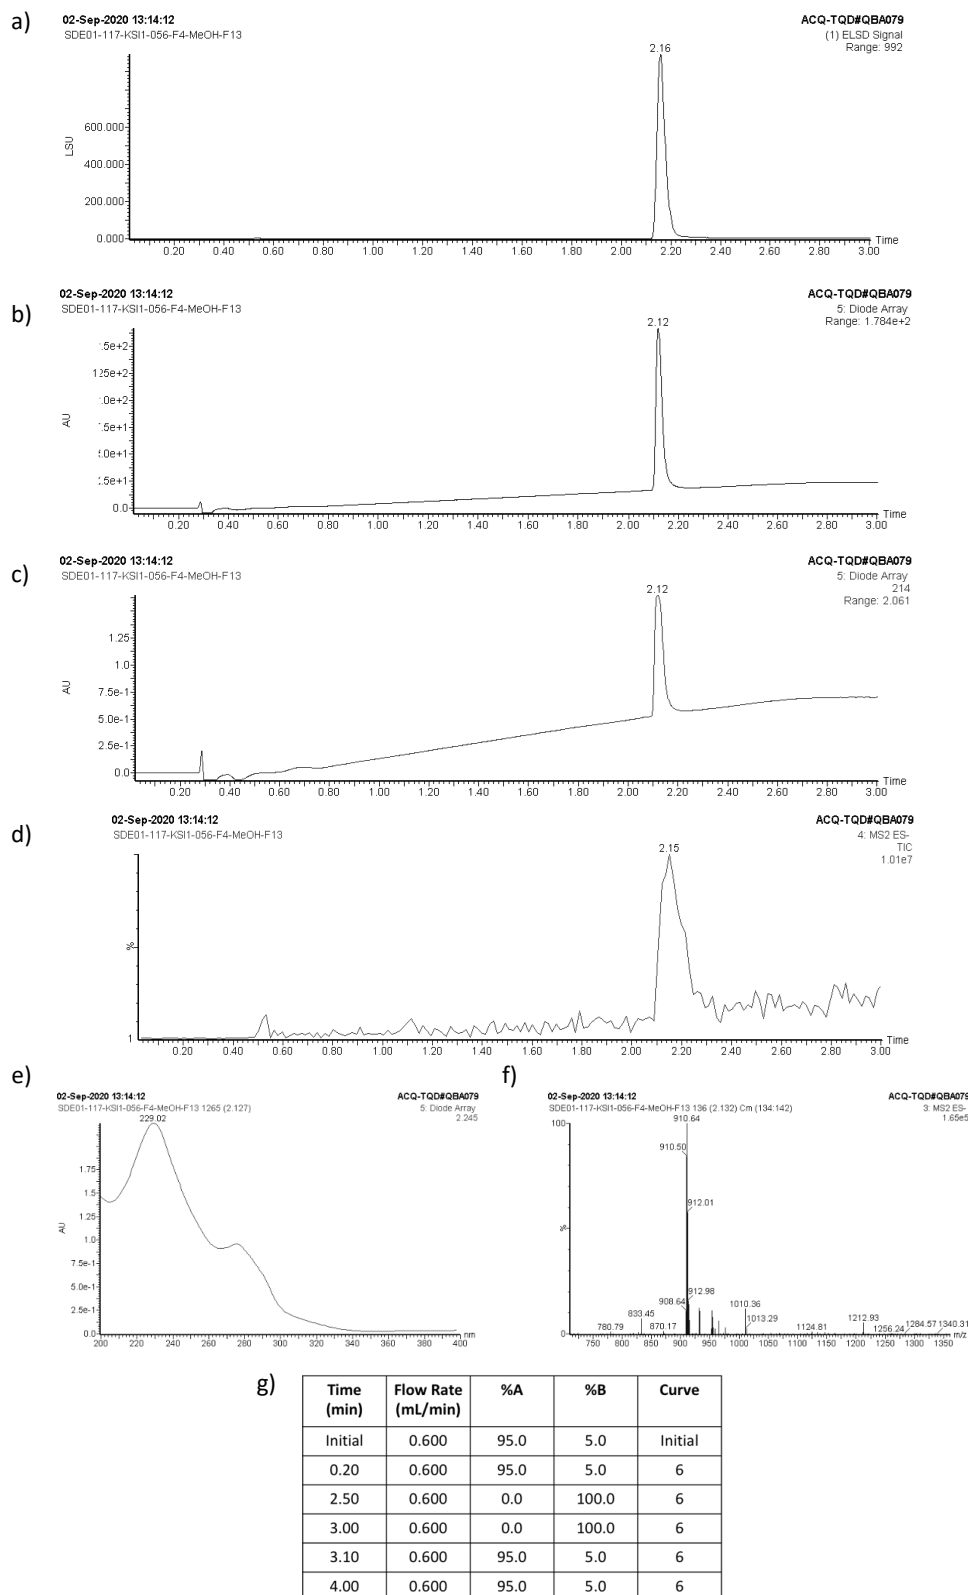

**Figure S14.** UPLC analysis of **F4**. a) ELSD detector, b) Photodiode array detector (absorbance maximum for each compound between 220–500), c) Photodiode array detector ( $\lambda$ :214nm), d) Mass detector (ESI), e) absorption spectra of the compound, f) Mass spectra of the compound, g) gradient.

Sample name: **F<sub>5E</sub>**  
 Column: BEH C18 2.1x50 mm 1.7  $\mu$ m

Solvent A: H<sub>2</sub>O+0.1% HCOOH  
 Solvent B: Acetonitrile +0,1% HCOOH

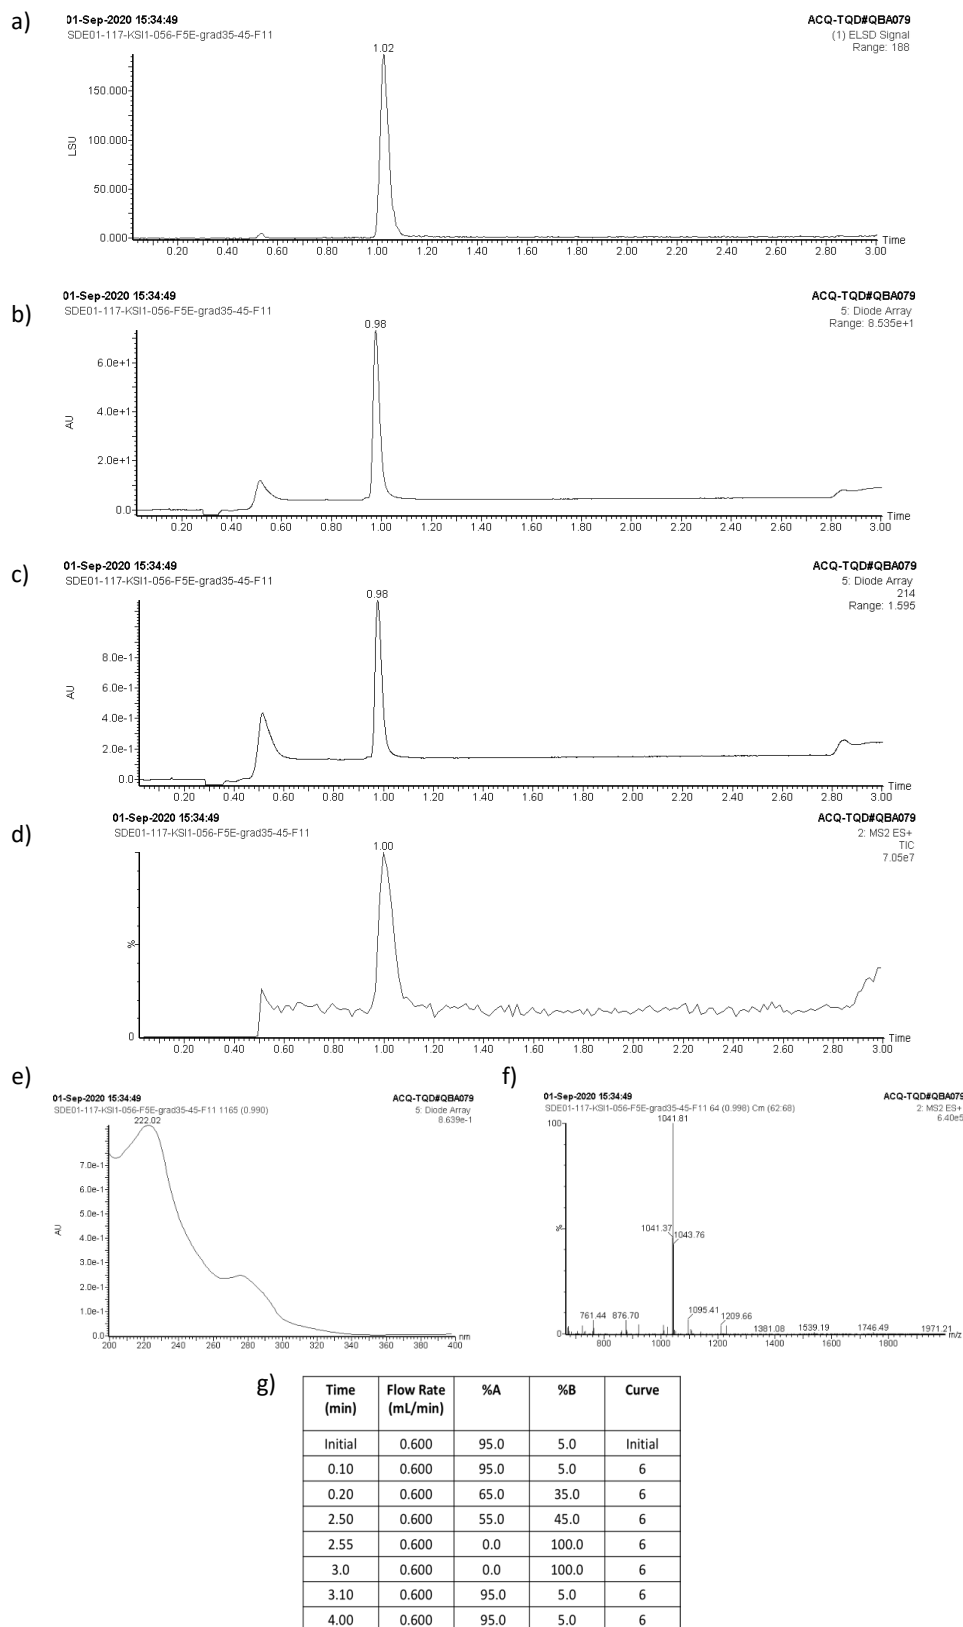

**Figure S15.** UPLC analysis of **F<sub>5E</sub>**. a) ELSD detector, b) Photodiode array detector (absorbance maximum for each compound between 220–500), c) Photodiode array detector ( $\lambda$ :214nm), d) Mass detector (ESI<sup>+</sup>), e) absorption spectra of the compound, f) Mass spectra of the compound, g) gradient.

Sample name: **F7E**  
 Column: BEH C18 2.1x50 mm 1.7  $\mu$ m

Solvent A: H<sub>2</sub>O+0.1% HCOOH  
 Solvent B: Acetonitrile +0,1% HCOOH

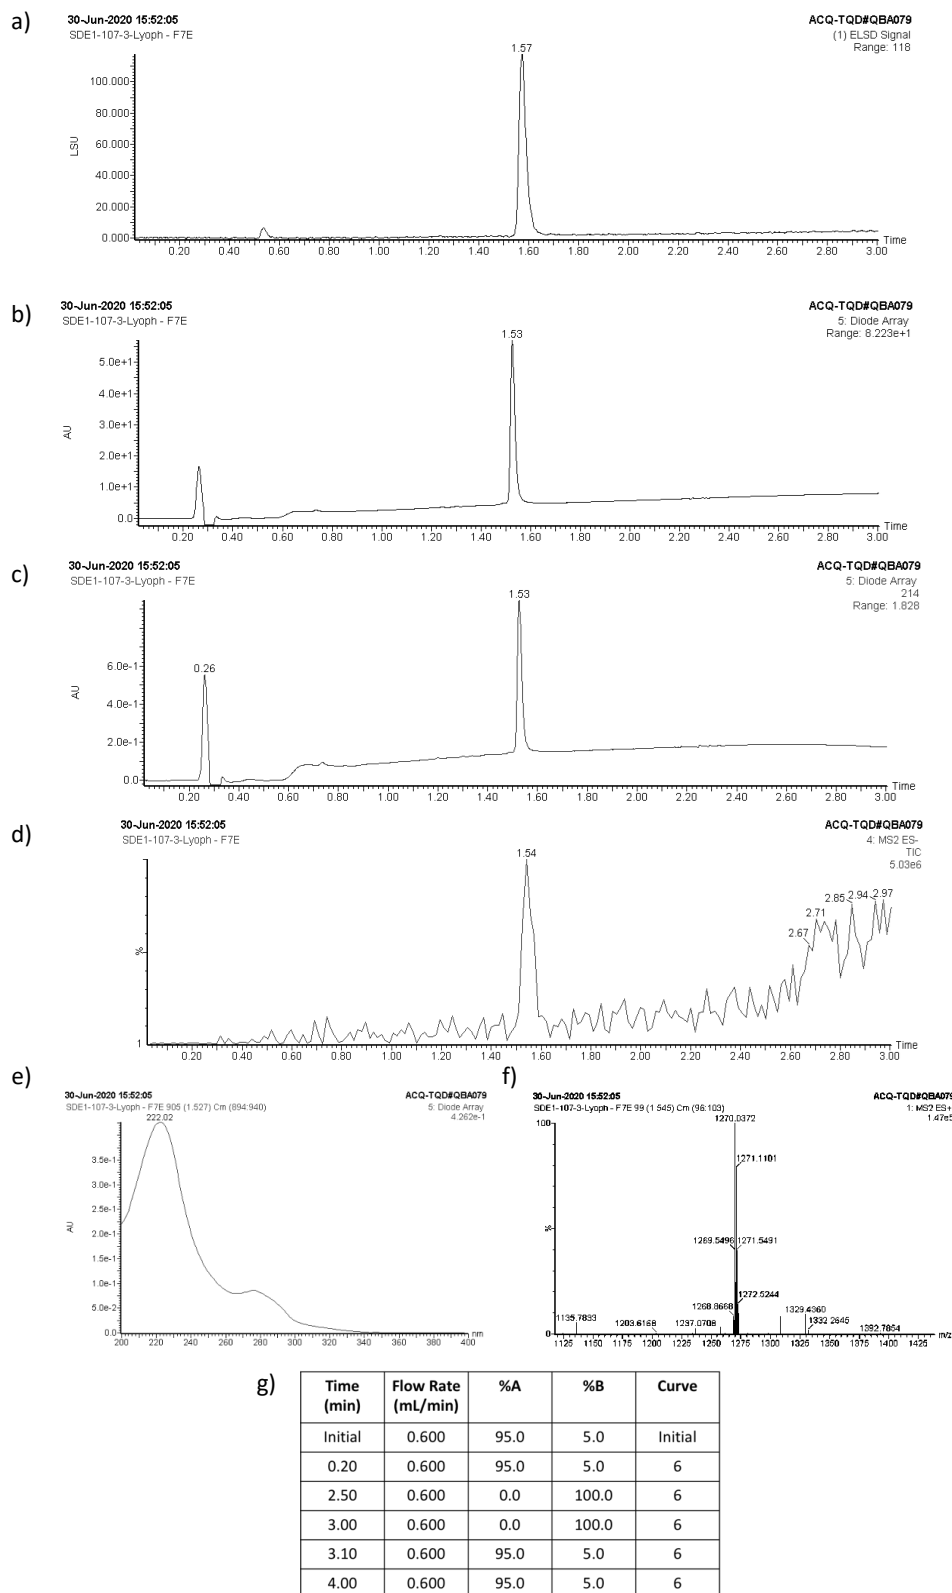

**Figure S16.** UPLC analysis of **F7E**. a) ELSD detector, b) Photodiode array detector (absorbance maximum for each compound between 220–500), c) Photodiode array detector ( $\lambda$ :214nm), d) Mass detector (ESI<sup>+</sup>), e) absorption spectra of the compound, f) Mass spectra of the compound, g) gradient.

Sample name: **F<sub>9E</sub>**  
 Column: BEH C18 2.1x50 mm 1.7  $\mu$ m

Solvent A: H<sub>2</sub>O+0.1% HCOOH  
 Solvent B: Acetonitrile +0,1% HCOOH

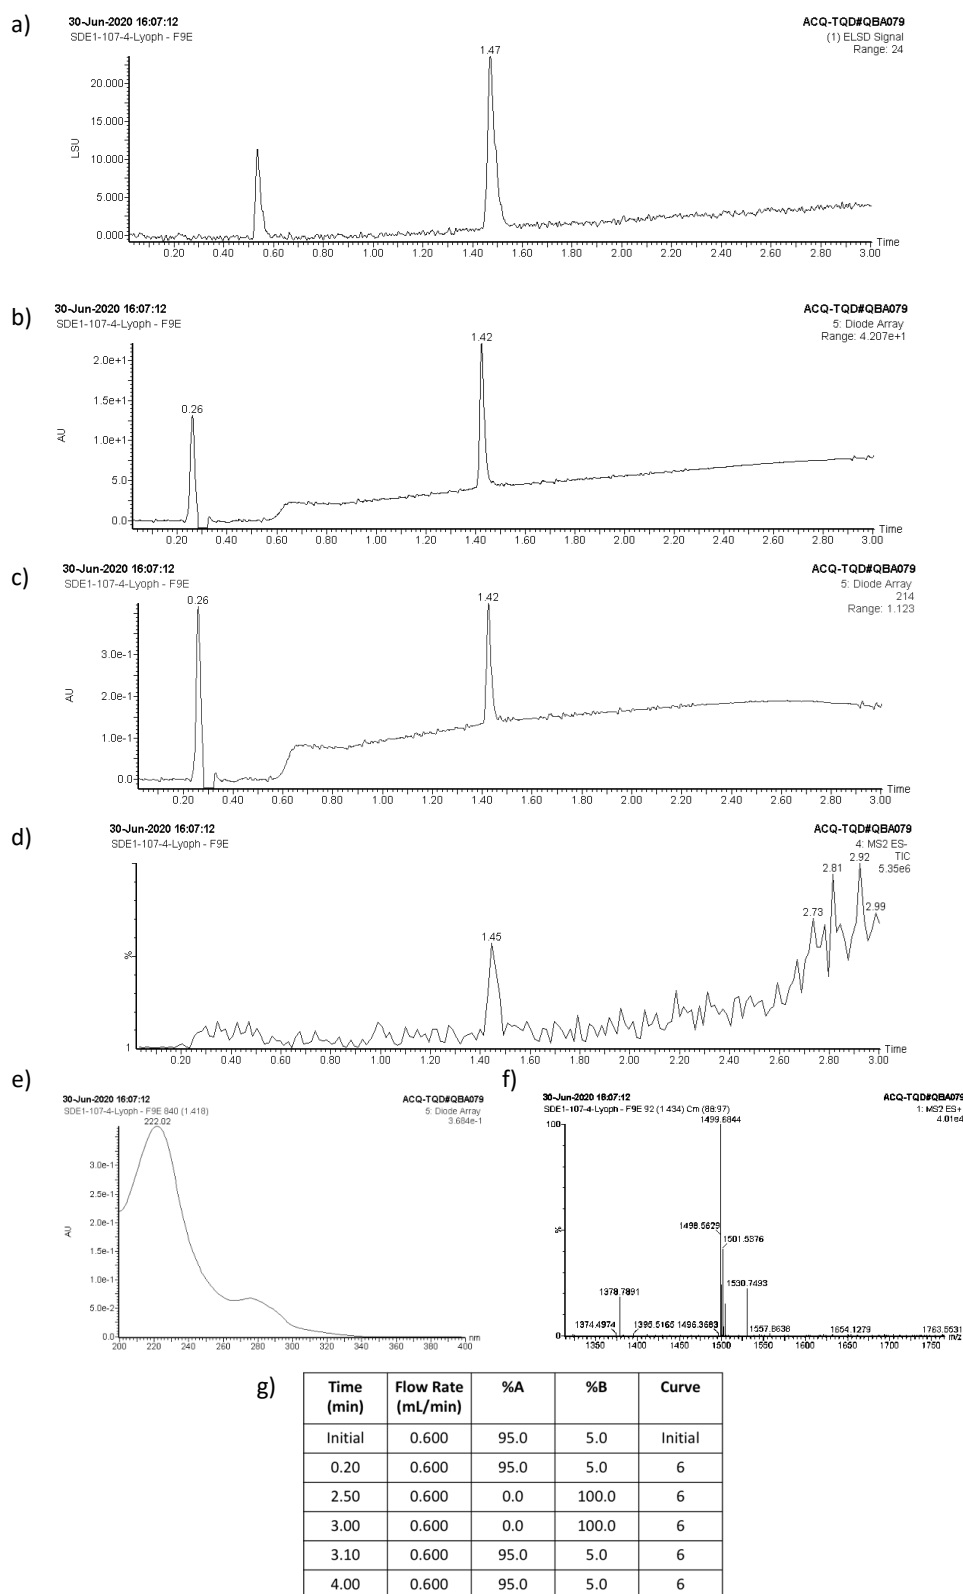

**Figure S17.** UPLC analysis of **F<sub>9E</sub>**. a) ELSD detector, b) Photodiode array detector (absorbance maximum for each compound between 220–500), c) Photodiode array detector ( $\lambda$ :214nm), d) Mass detector (ESI<sup>+</sup>), e) absorption spectra of the compound, f) Mass spectra of the compound, g) gradient.



Sample name: **F<sub>11E</sub>**  
 Column: BEH C18 2.1x50 mm 1.7  $\mu$ m

Solvent A: H<sub>2</sub>O+0.1% HCOOH  
 Solvent B: Acetonitrile +0,1% HCOOH

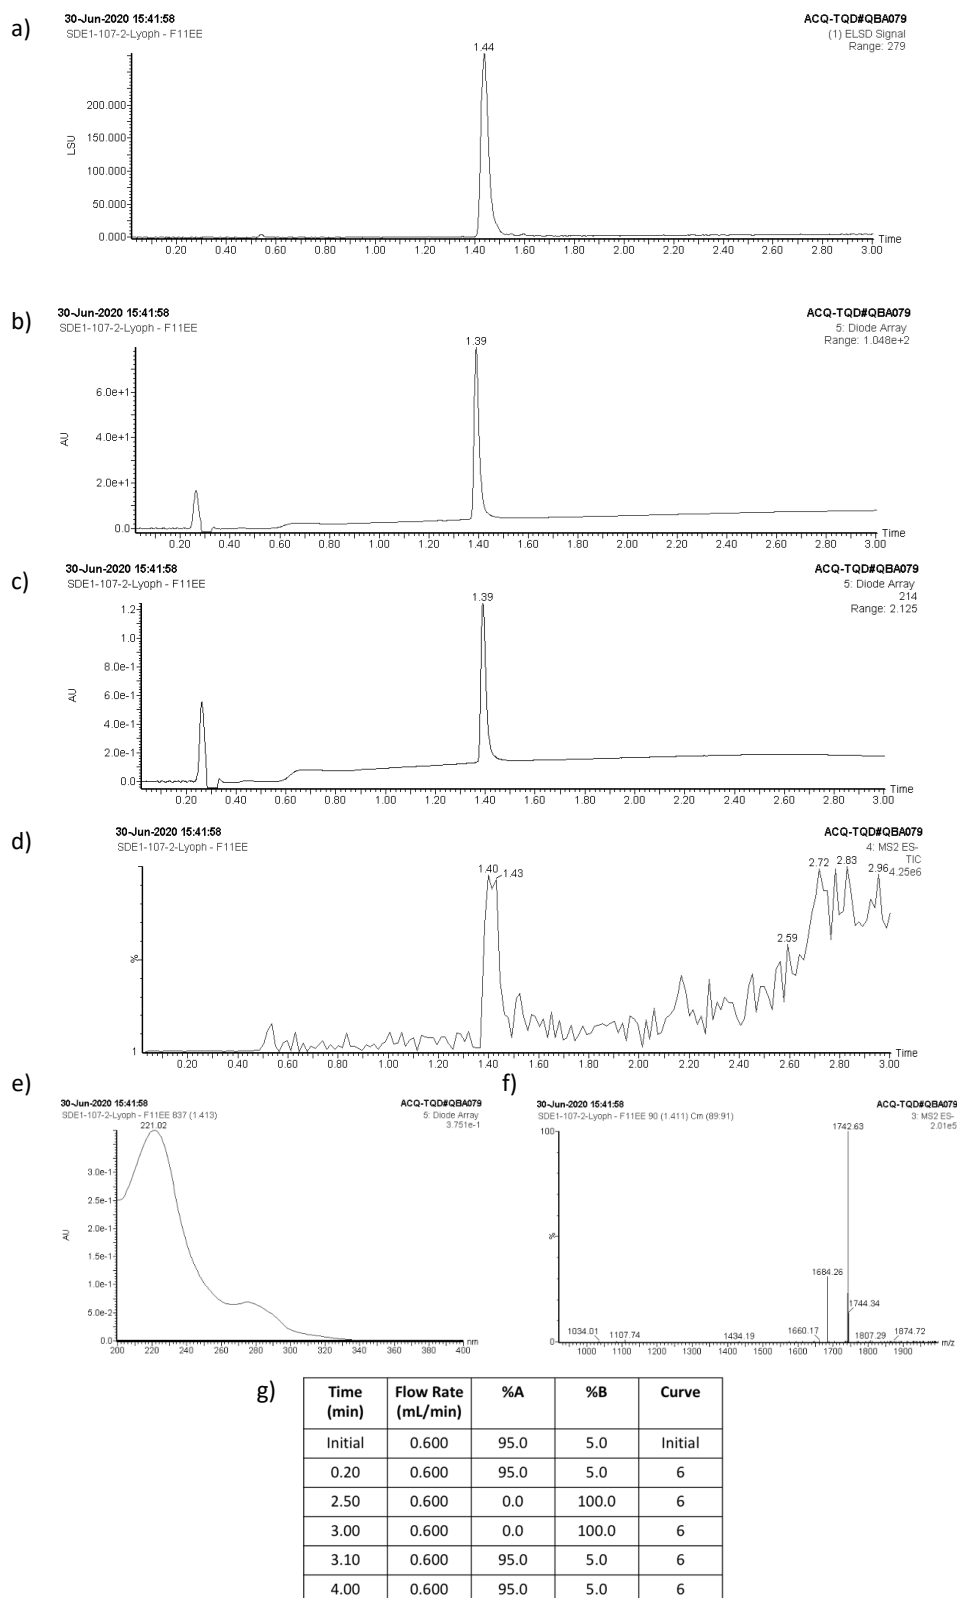

**Figure S18.** UPLC analysis of **F<sub>11E</sub>**. a) ELSD detector, b) Photodiode array detector (absorbance maximum for each compound between 220–500), c) Photodiode array detector ( $\lambda$ :214nm), d) Mass detector (ESI), e) absorption spectra of the compound, f) Mass spectra of the compound, g) gradient.

Sample name: **F<sub>11SE</sub>**  
 Column: BEH C18 2.1x50 mm 1.7  $\mu$ m

Solvent A: H<sub>2</sub>O+0.1% HCOOH  
 Solvent B: Acetonitrile +0,1% HCOOH

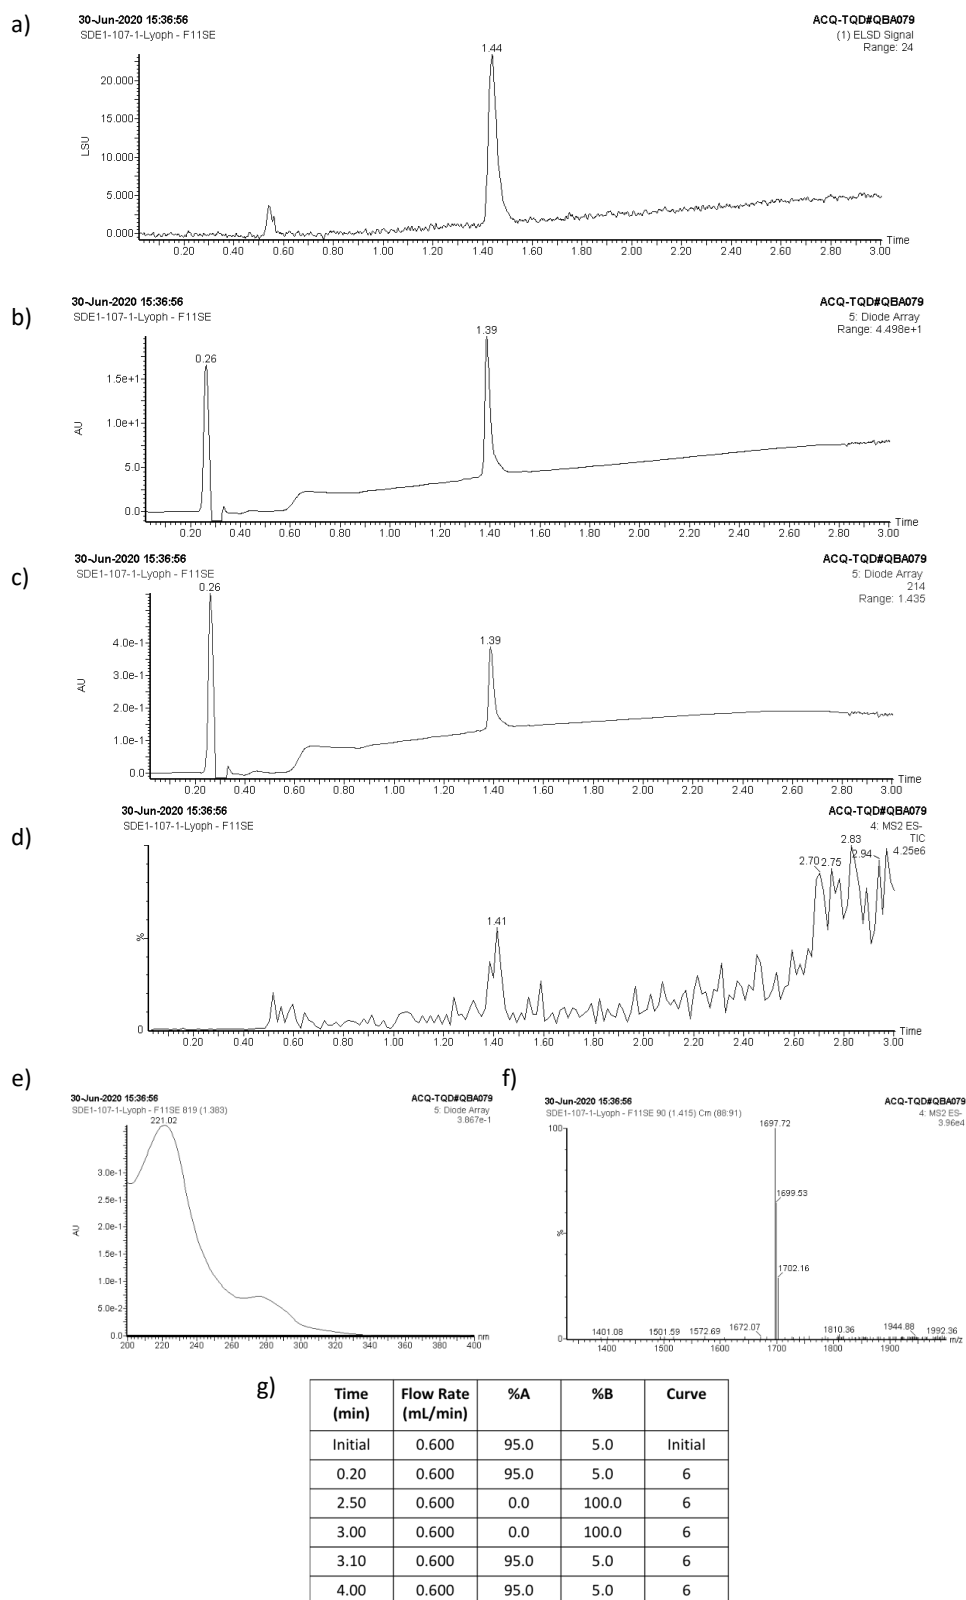

**Figure S19.** UPLC analysis of **F<sub>11SE</sub>**. a) ELSD detector, b) Photodiode array detector (absorbance maximum for each compound between 220–500), c) Photodiode array detector ( $\lambda$ :214nm), d) Mass detector (ESI), e) absorption spectra of the compound, f) Mass spectra of the compound, g) gradient.

Sample name: **F<sub>11SS</sub>**  
 Column: BEH C18 2.1x50 mm 1.7  $\mu$ m

Solvent A: H<sub>2</sub>O+0.1% HCOOH  
 Solvent B: Acetonitrile +0,1% HCOOH

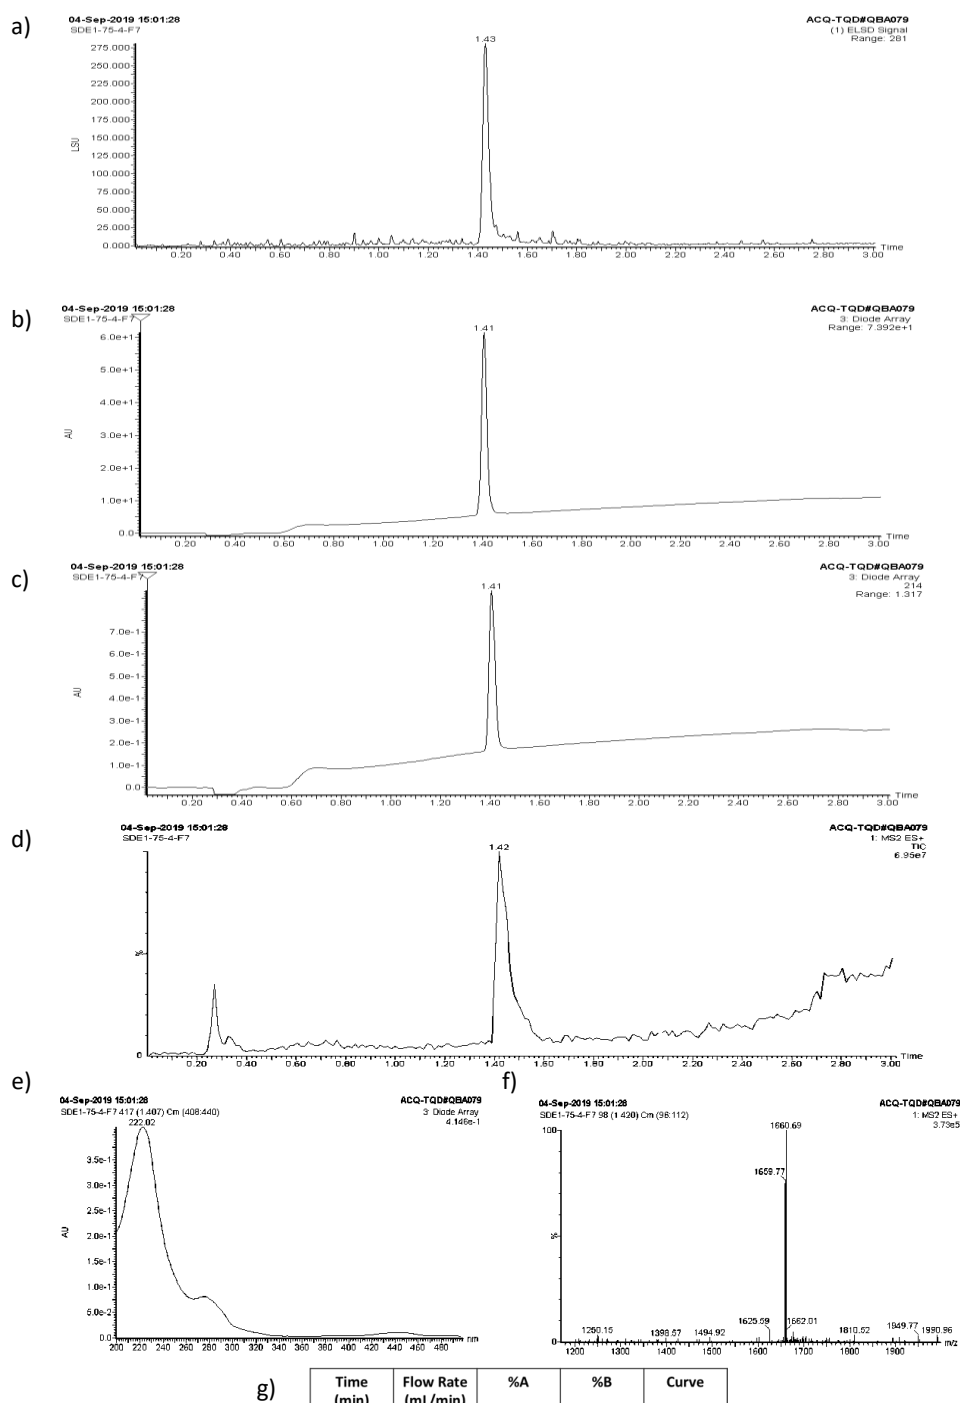

**Figure S20.** UPLC analysis of **F<sub>11SS</sub>**. a) ELSD detector, b) Photodiode array detector (absorbance maximum for each compound between 220–500), c) Photodiode array detector ( $\lambda$ :214nm), d) Mass detector (ESI<sup>+</sup>), e) absorption spectra of the compound, f) Mass spectra of the compound, g) gradient.

Sample name: **pF<sub>11</sub>**  
 Column: BEH C18 2.1x50 mm 1.7  $\mu$ m

Solvent A: H<sub>2</sub>O+0.1% HCOOH  
 Solvent B: Acetonitrile +0,1% HCOOH

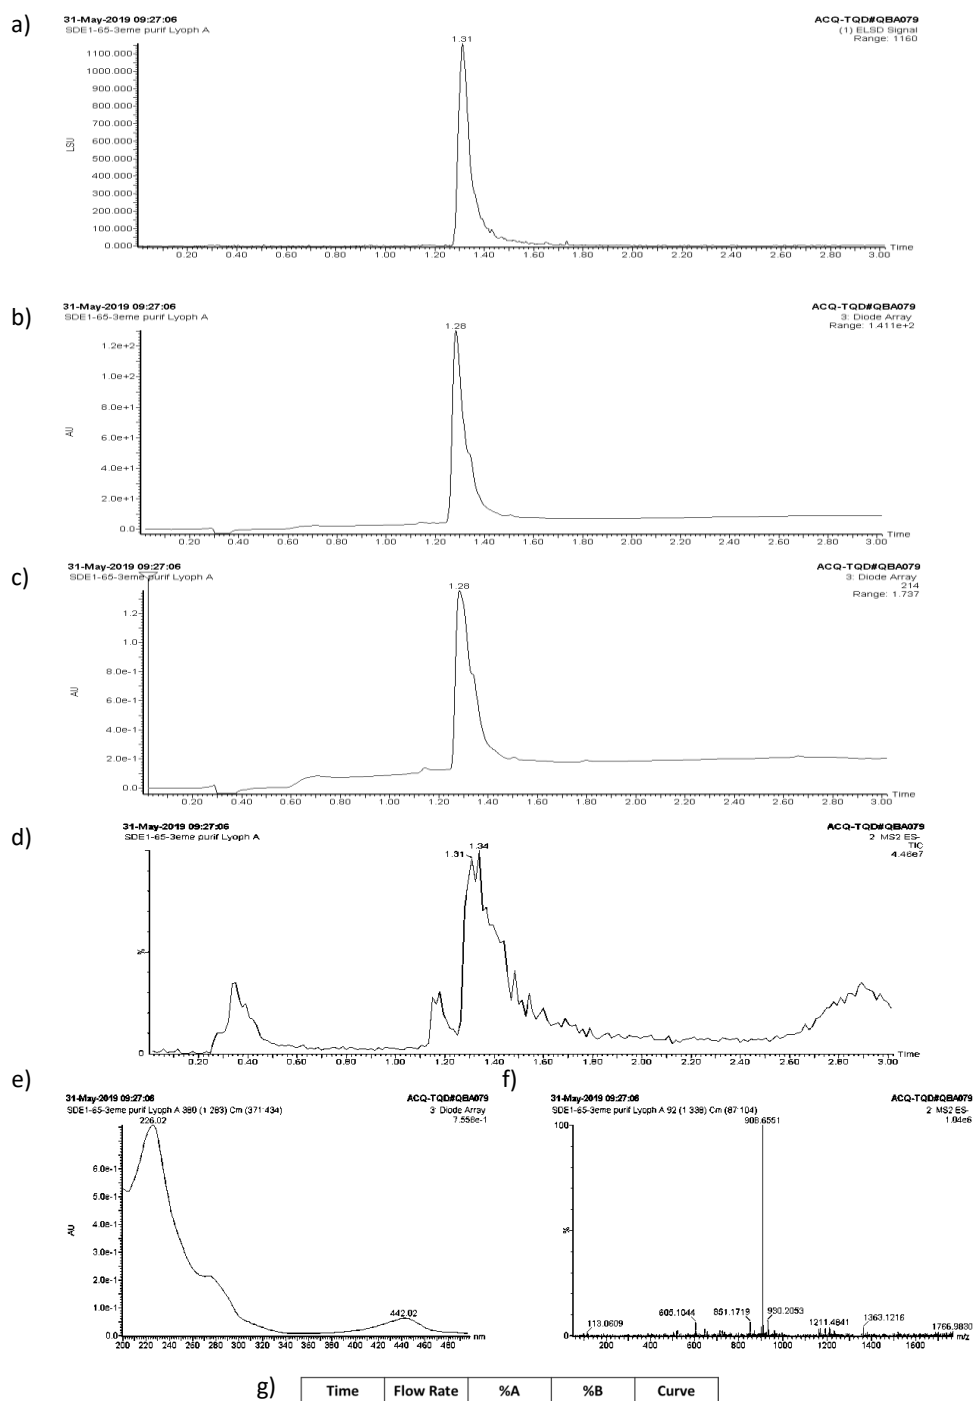

g)

| Time (min) | Flow Rate (mL/min) | %A   | %B    | Curve   |
|------------|--------------------|------|-------|---------|
| Initial    | 0.600              | 95.0 | 5.0   | Initial |
| 0.10       | 0.600              | 95.0 | 5.0   | 6       |
| 0.20       | 0.600              | 80.0 | 20.0  | 6       |
| 2.50       | 0.600              | 70.0 | 30.0  | 6       |
| 2.55       | 0.600              | 0.0  | 100.0 | 6       |
| 3.0        | 0.600              | 0.0  | 100.0 | 6       |
| 3.10       | 0.600              | 95.0 | 5.0   | 6       |
| 4.00       | 0.600              | 95.0 | 5.0   | 6       |

**Figure S21.** UPLC analysis of **pF<sub>11</sub>**. a) ELSD detector, b) Photodiode array detector (absorbance maximum for each compound between 220–500), c) Photodiode array detector ( $\lambda$ :214nm), d) Mass detector (ESI), e) absorption spectra of the compound, f) Mass spectra of the compound, g) gradient.

Sample name: **BCN<sub>5E</sub>**

Column: BEH C18 2.1x50 mm 1.7  $\mu$ m

Solvent A: H<sub>2</sub>O+0.1% HCOOH

Solvent B: Acetonitrile +0,1% HCOOH

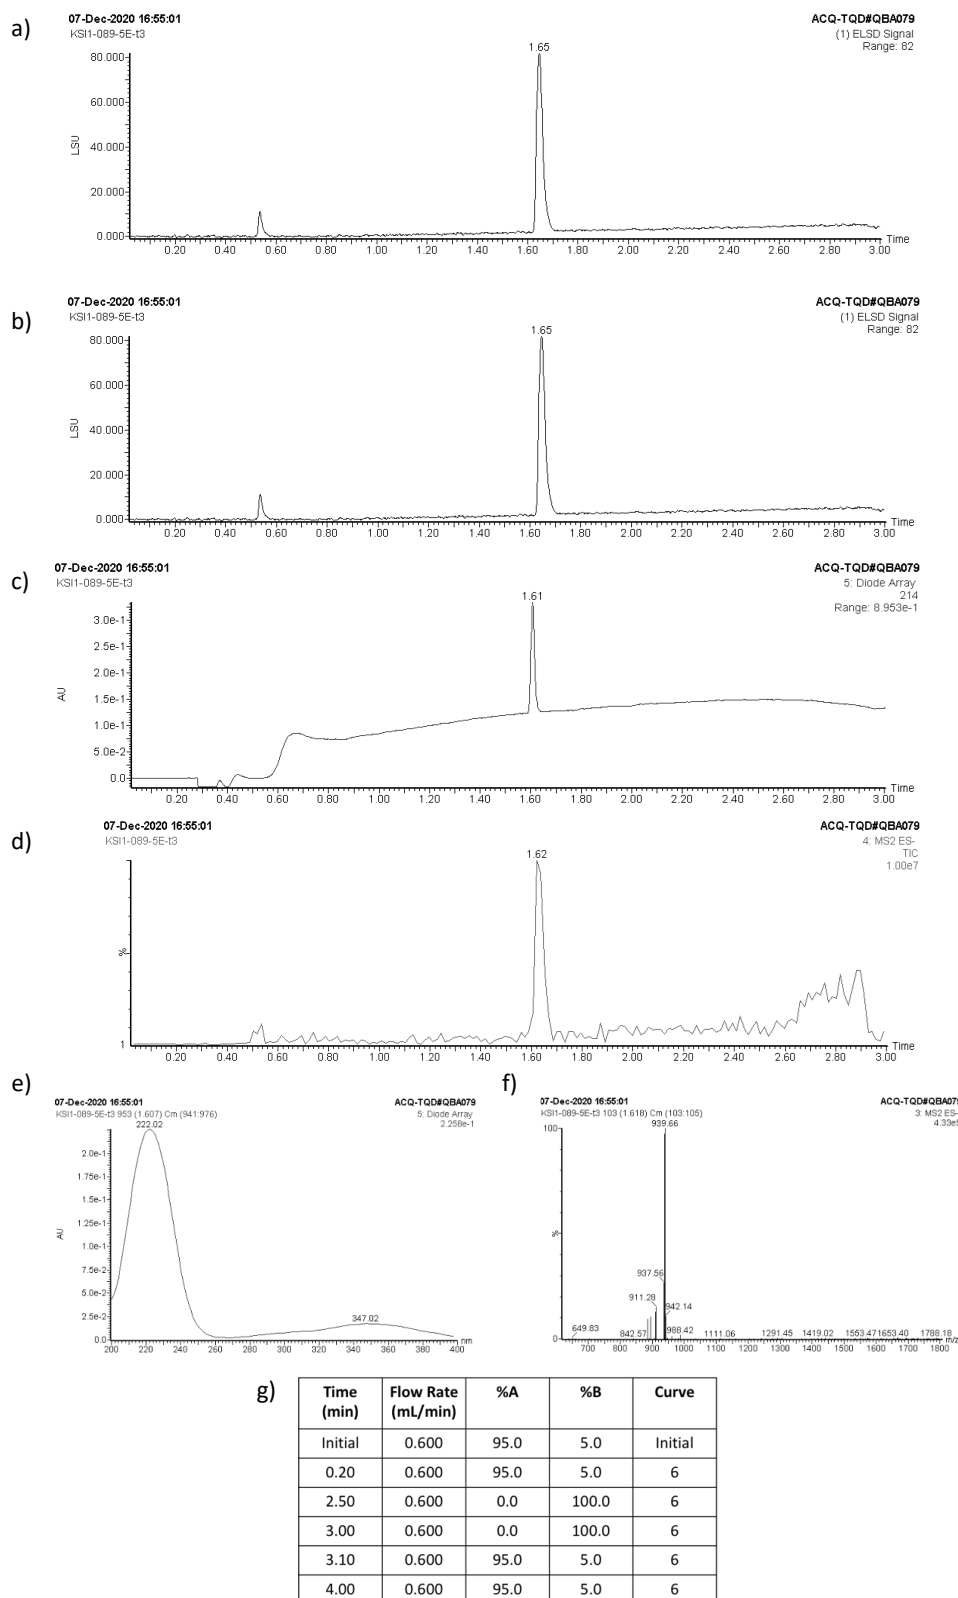

**Figure S22.** UPLC analysis of **BCN<sub>5E</sub>**. a) ELSD detector, b) Photodiode array detector (absorbance maximum for each compound between 220–500), c) Photodiode array detector ( $\lambda$ :214nm), d) Mass detector (ESI), e) absorption spectra of the compound, f) Mass spectra of the compound, g) gradient.

Sample name: **BCN<sub>6E</sub>**  
 Column: BEH C18 2.1x50 mm 1.7  $\mu$ m

Solvent A: H<sub>2</sub>O+0.1% HCOOH  
 Solvent B: Acetonitrile +0,1% HCOOH

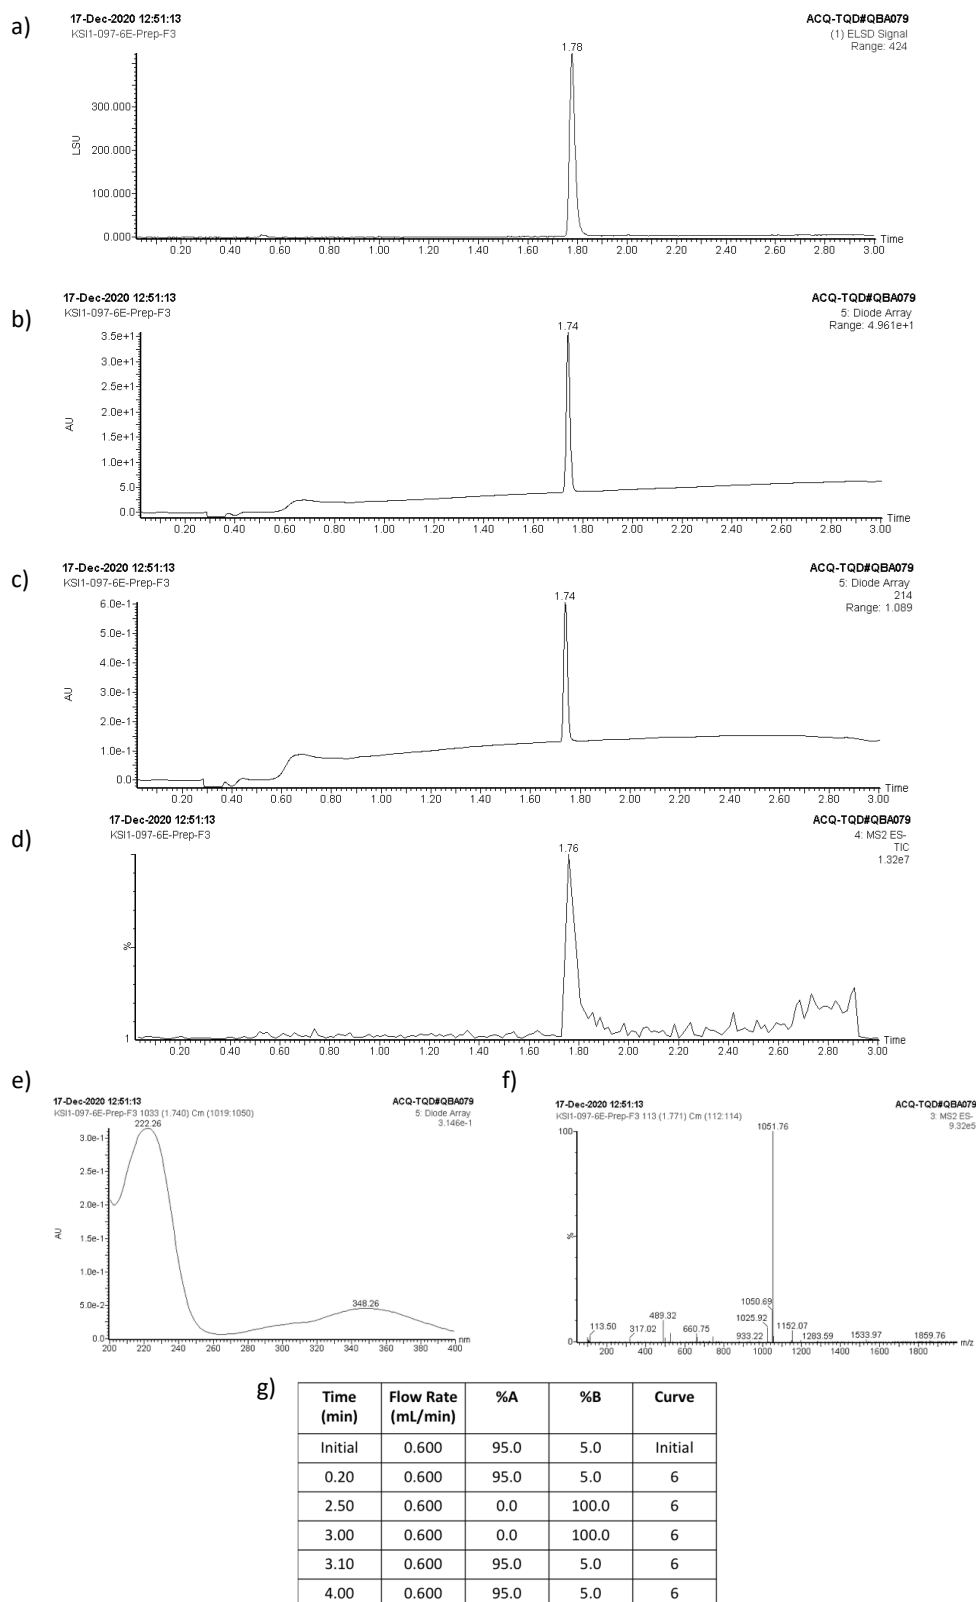

**Figure S23.** UPLC analysis of **BCN<sub>6E</sub>**. a) ELSD detector, b) Photodiode array detector (absorbance maximum for each compound between 220–500), c) Photodiode array detector ( $\lambda$ :214nm), d) Mass detector (ESI), e) absorption spectra of the compound, f) Mass spectra of the compound, g) gradient.

Sample name: **BCN<sub>7E</sub>**  
 Column: BEH C18 2.1x50 mm 1.7  $\mu$ m

Solvent A: H<sub>2</sub>O+0.1% HCOOH  
 Solvent B: Acetonitrile +0,1% HCOOH

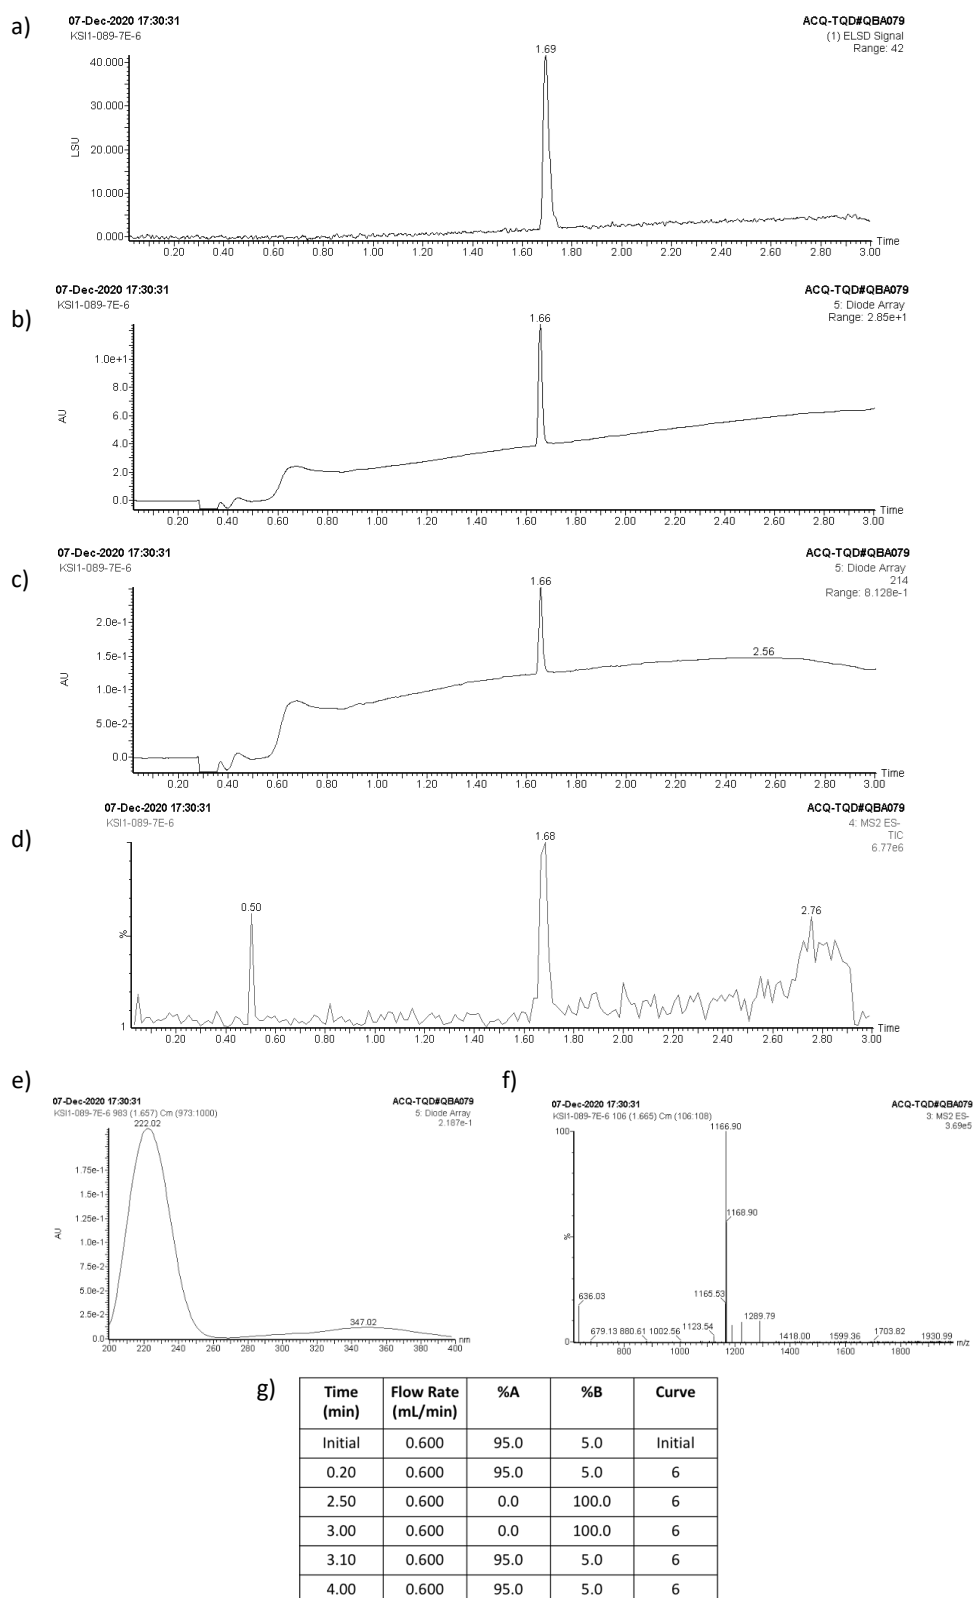

**Figure S24.** UPLC analysis of **BCN<sub>7E</sub>**. a) ELSD detector, b) Photodiode array detector (absorbance maximum for each compound between 220–500), c) Photodiode array detector ( $\lambda$ :214nm), d) Mass detector (ESI), e) absorption spectra of the compound, f) Mass spectra of the compound, g) gradient.

Sample name: **BCN<sub>8E</sub>**

Column: BEH C18 2.1x50 mm 1.7  $\mu$ m

Solvent A: H<sub>2</sub>O+0.1% HCOOH

Solvent B: Acetonitrile +0,1% HCOOH

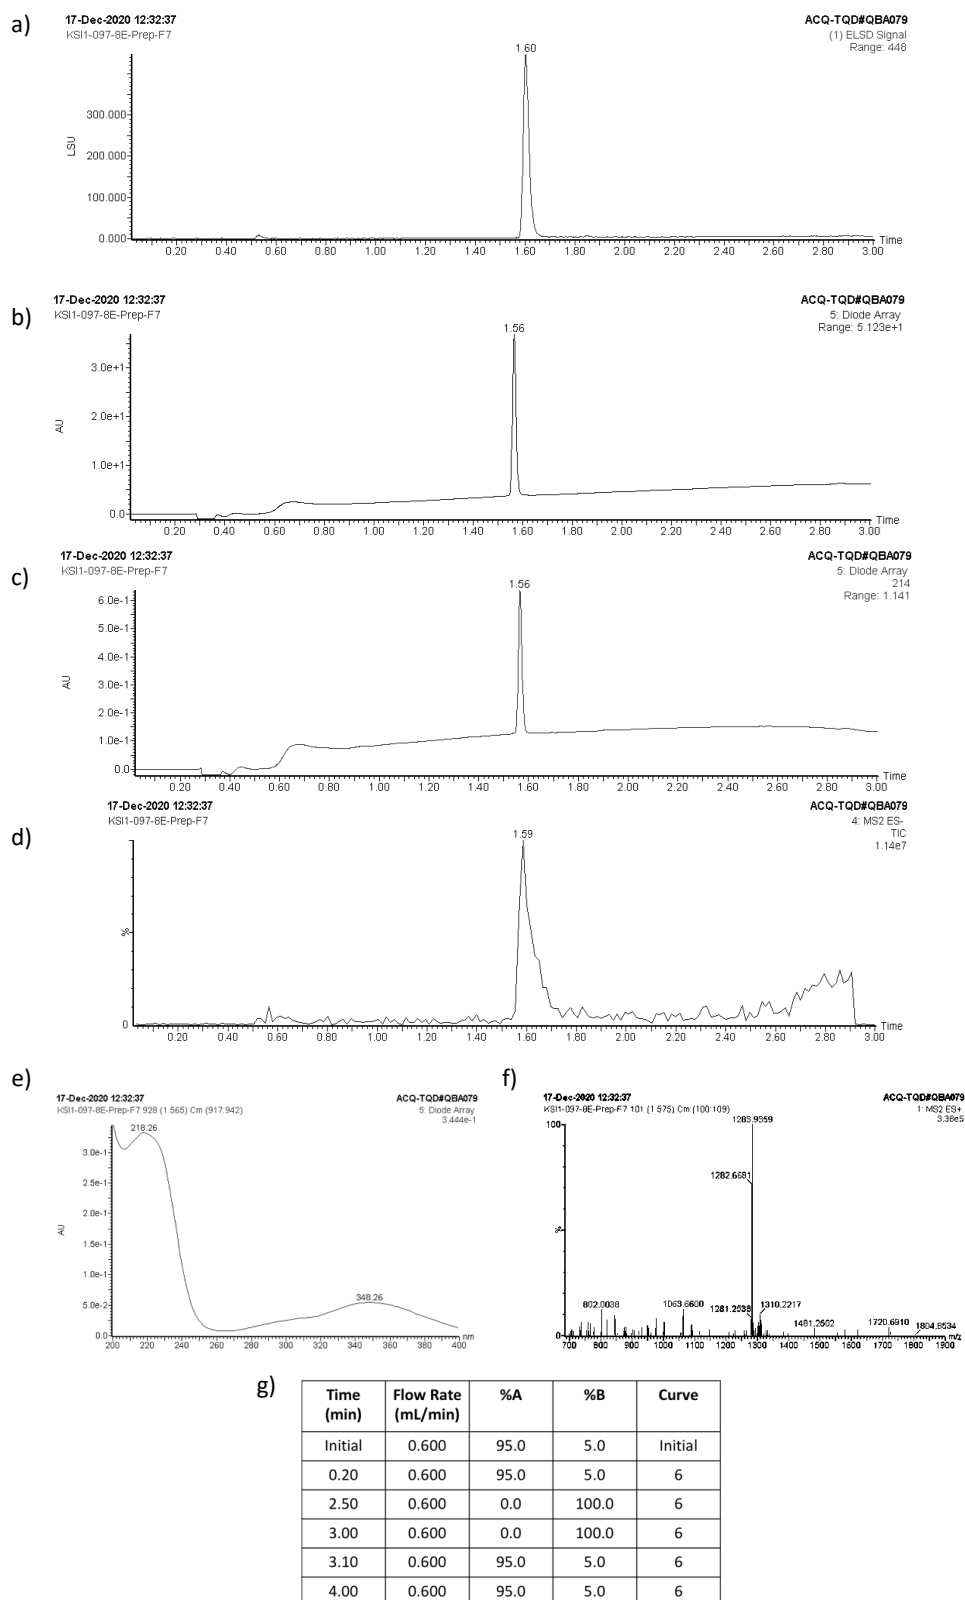

**Figure S25.** UPLC analysis of **BCN<sub>8E</sub>**. a) ELSD detector, b) Photodiode array detector (absorbance maximum for each compound between 220–500), c) Photodiode array detector ( $\lambda$ :214nm), d) Mass detector (ESI), e) absorption spectra of the compound, f) Mass spectra of the compound, g) gradient.



Sample name: **BCN<sub>9E</sub>**

Column: BEH C18 2.1x50 mm 1.7  $\mu$ m

Solvent A: H<sub>2</sub>O+0.1% HCOOH

Solvent B: Acetonitrile +0,1% HCOOH

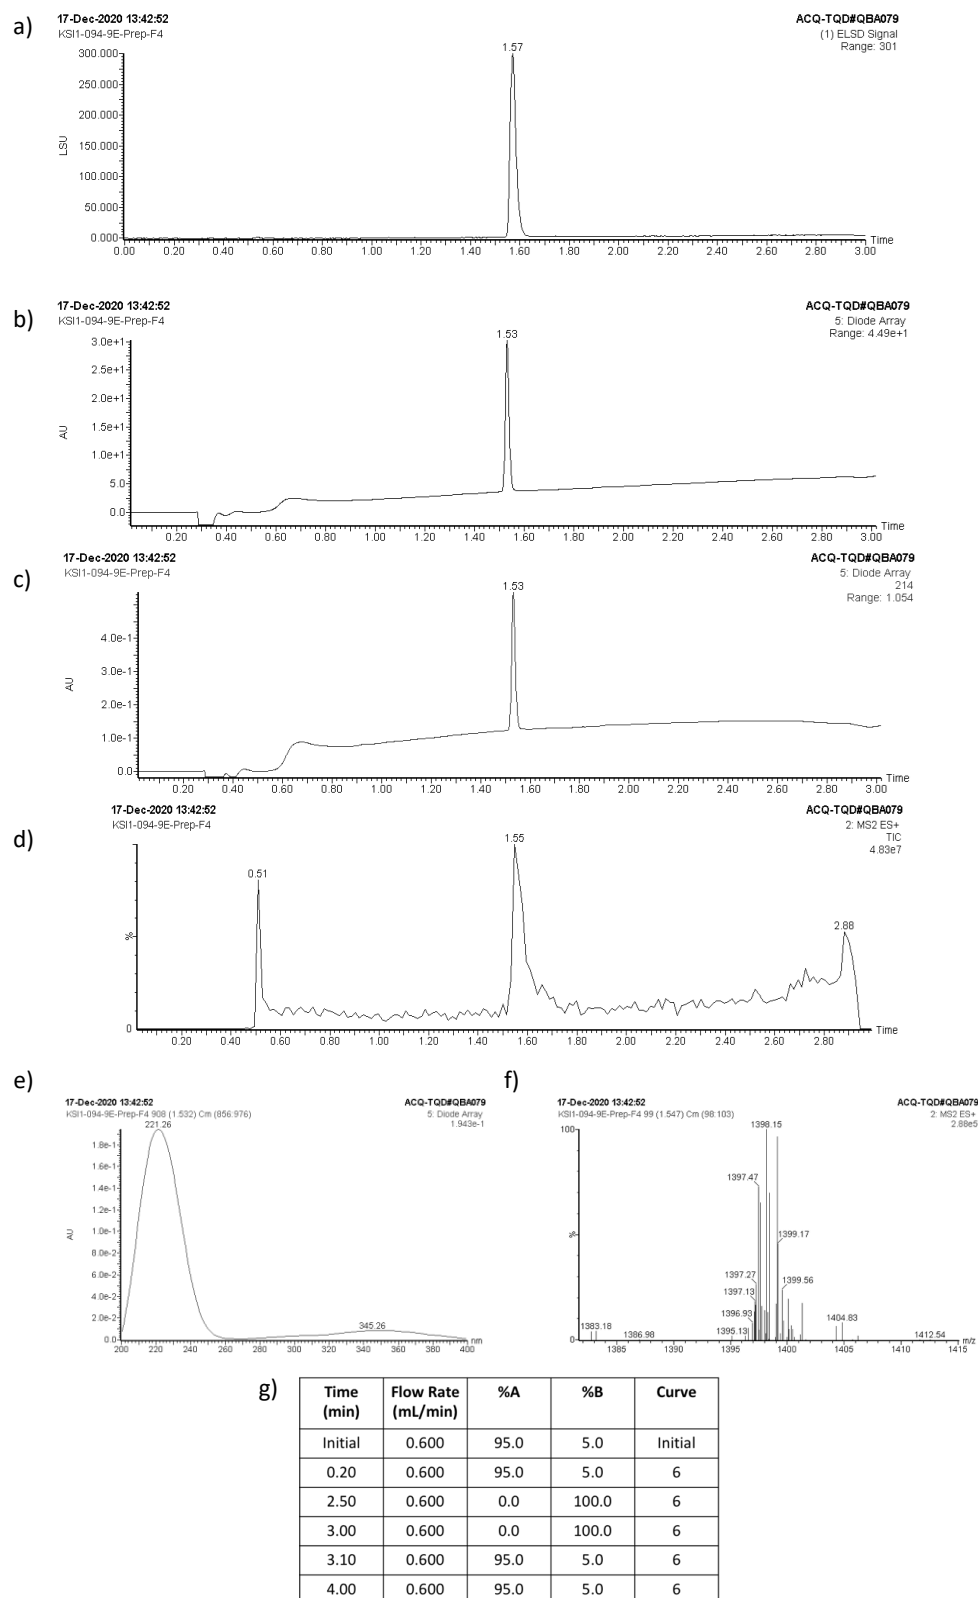

**Figure S26.** UPLC analysis of **BCN<sub>9E</sub>**. a) ELSD detector, b) Photodiode array detector (absorbance maximum for each compound between 220–500), c) Photodiode array detector ( $\lambda$ :214nm), d) Mass detector (ESI<sup>+</sup>), e) absorption spectra of the compound, f) Mass spectra of the compound, g) gradient.

Sample name: **BCN<sub>10EE</sub>**  
 Column: BEH C18 2.1x50 mm 1.7  $\mu$ m

Solvent A: H<sub>2</sub>O+0.1% HCOOH  
 Solvent B: Acetonitrile +0,1% HCOOH

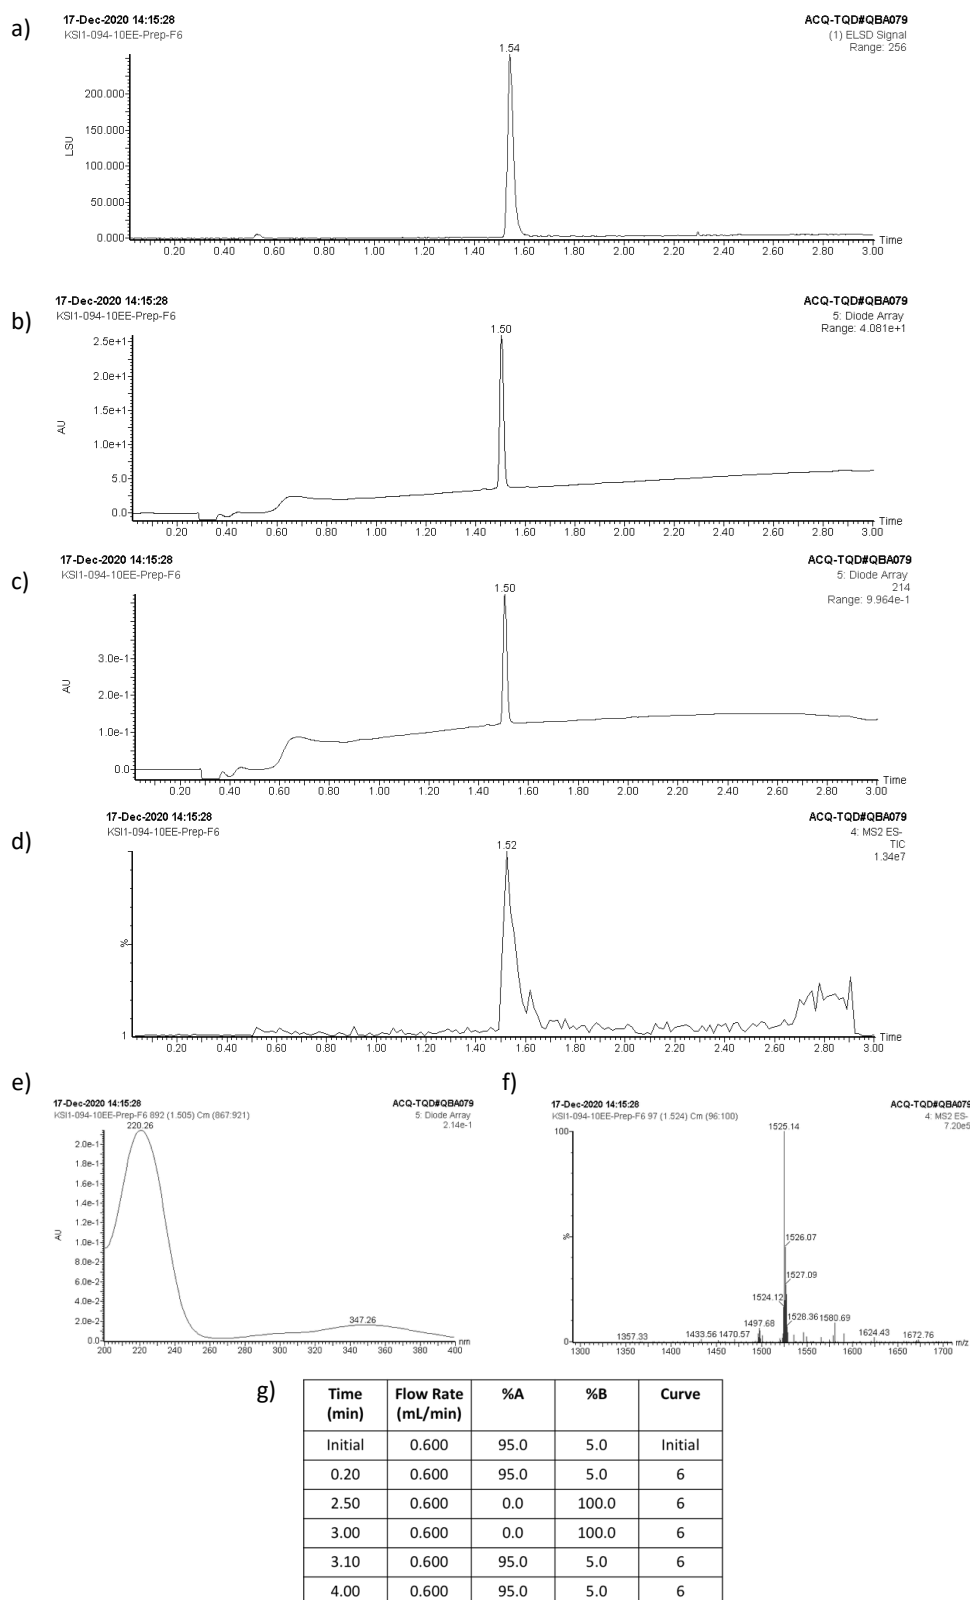

**Figure S27.** UPLC analysis of **BCN<sub>10EE</sub>**. a) ELSD detector, b) Photodiode array detector (absorbance maximum for each compound between 220–500), c) Photodiode array detector ( $\lambda$ :214nm), d) Mass detector (ESI), e) absorption spectra of the compound, f) Mass spectra of the compound, g) gradient.

Sample name: **BCN<sub>11EE</sub>**  
 Column: BEH C18 2.1x50 mm 1.7  $\mu$ m

Solvent A: H<sub>2</sub>O+0.1% HCOOH  
 Solvent B: Acetonitrile +0,1% HCOOH

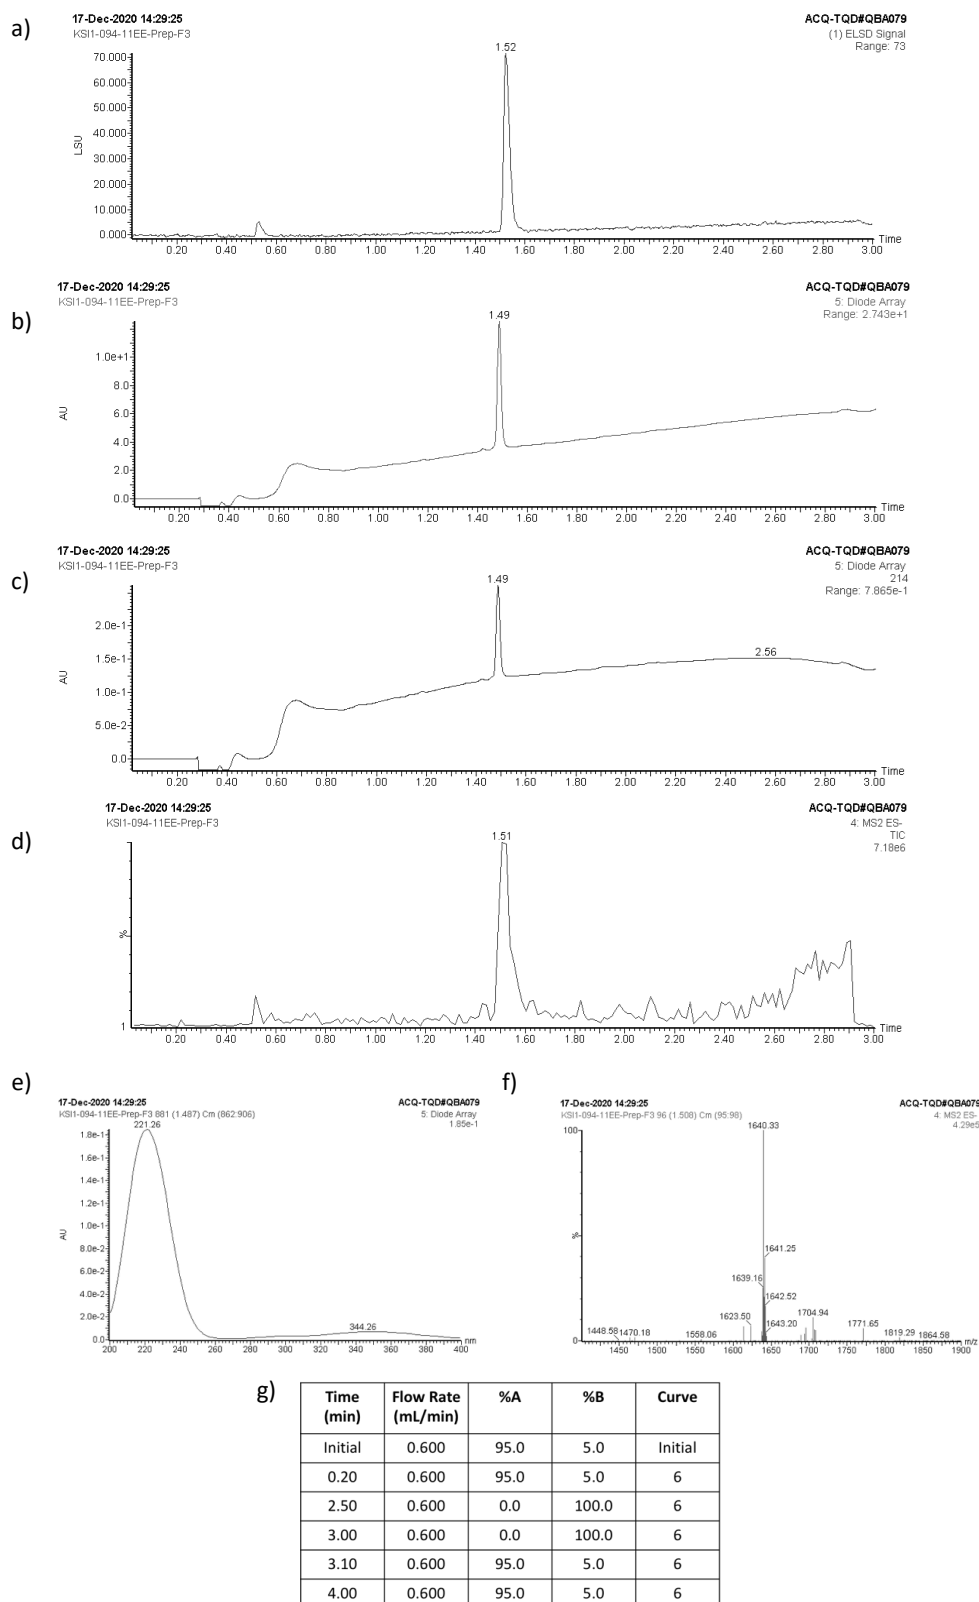

**Figure S28.** UPLC analysis of **BCN<sub>11EE</sub>**. a) ELSD detector, b) Photodiode array detector (absorbance maximum for each compound between 220–500), c) Photodiode array detector ( $\lambda$ :214nm), d) Mass detector (ESI), e) absorption spectra of the compound, f) Mass spectra of the compound, g) gradient.

Sample name: **BCN<sub>11</sub>SE**  
 Column: BEH C18 2.1x50 mm 1.7  $\mu$ m

Solvent A: H<sub>2</sub>O+0.1% HCOOH  
 Solvent B: Acetonitrile +0,1% HCOOH

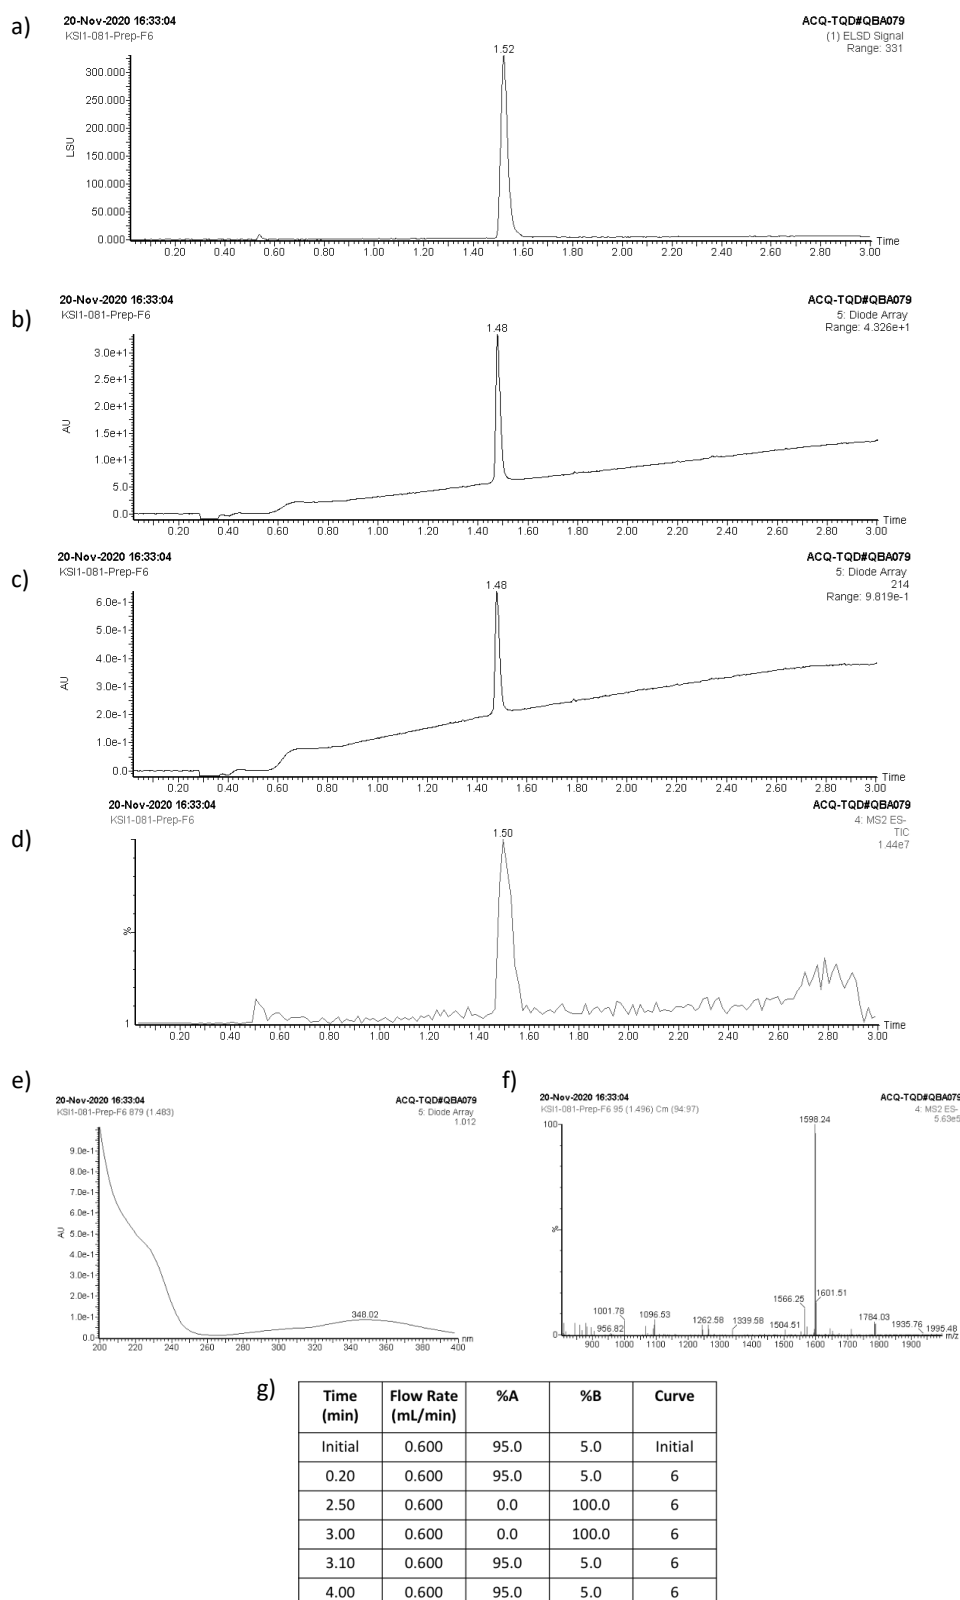

**Figure S29.** UPLC analysis of **BCN<sub>11</sub>SE**. a) ELSD detector, b) Photodiode array detector (absorbance maximum for each compound between 220–500), c) Photodiode array detector ( $\lambda$ :214nm), d) Mass detector (ESI), e) absorption spectra of the compound, f) Mass spectra of the compound, g) gradient.

Sample name: **Blank**  
 Column: BEH C18 2.1x50 mm 1.7  $\mu$ m

Solvent A: H<sub>2</sub>O+0.1% HCOOH  
 Solvent B: Acetonitrile +0,1% HCOOH

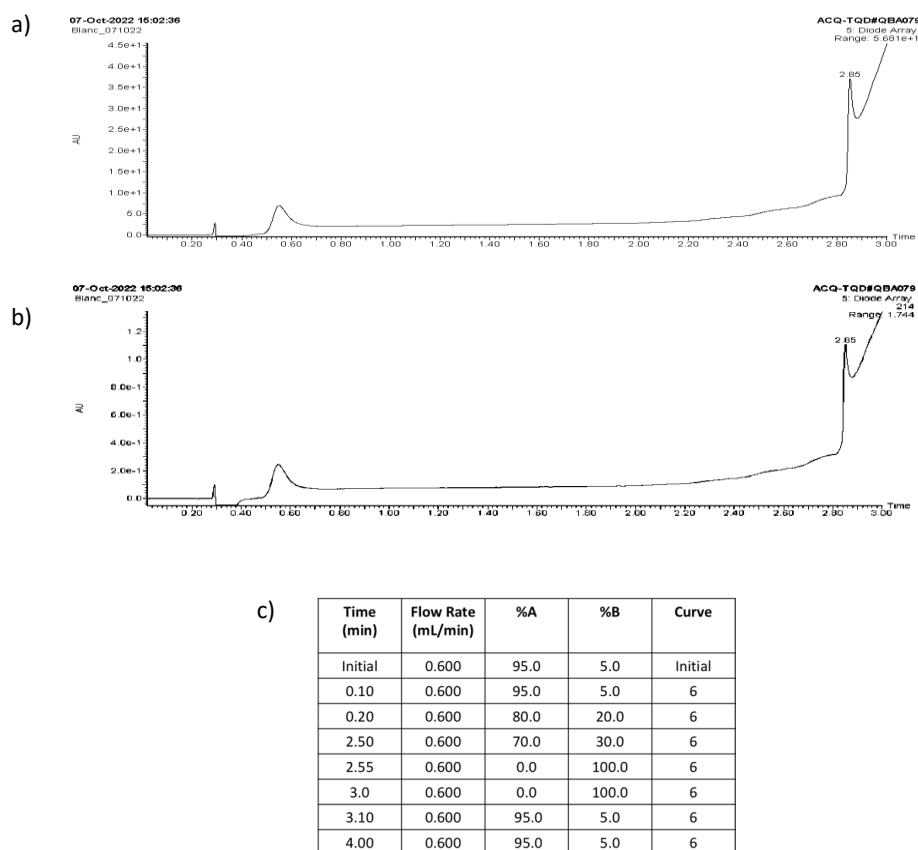

**Figure S30.** UPLC analysis of **Blank**. a) Photodiode array detector (absorbance maximum for each compound between 220–500), b) Photodiode array detector ( $\lambda$ :214nm), c) gradient.

## HPLC Traces

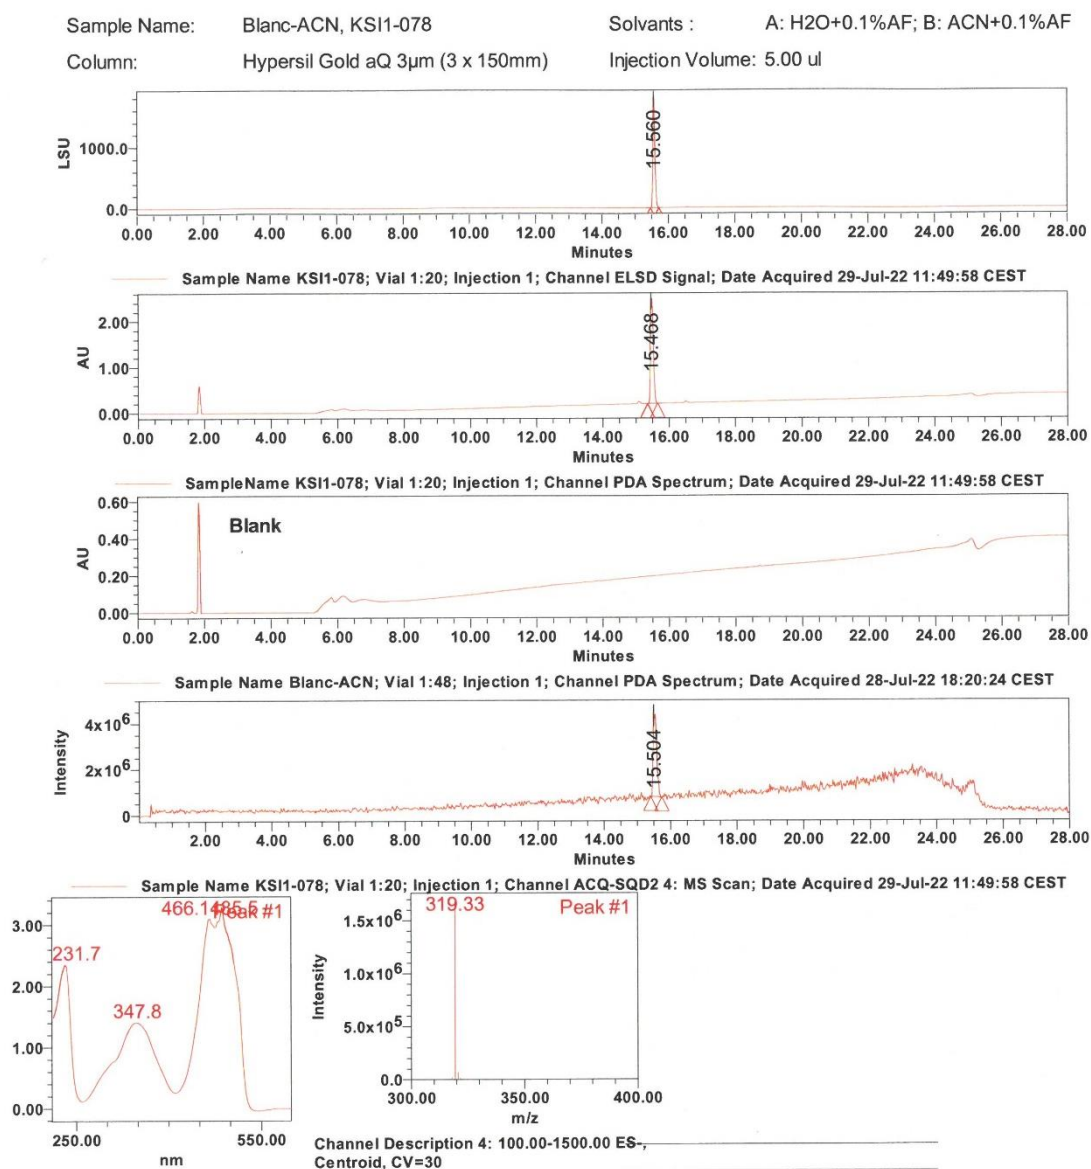

|   | Time (min) | Flow Rate (mL/min) | %A    | %B    | %C  | %D  | Curve   |
|---|------------|--------------------|-------|-------|-----|-----|---------|
| 1 | Initial    | 0.500              | 100.0 | 0.0   | 0.0 | 0.0 | Initial |
| 2 | 3.00       | 0.500              | 100.0 | 0.0   | 0.0 | 0.0 | 6       |
| 3 | 23.00      | 0.500              | 0.0   | 100.0 | 0.0 | 0.0 | 6       |
| 4 | 28.00      | 0.500              | 0.0   | 100.0 | 0.0 | 0.0 | 6       |
| 5 | 29.00      | 0.500              | 100.0 | 0.0   | 0.0 | 0.0 | 6       |
| 6 | 39.00      | 0.500              | 100.0 | 0.0   | 0.0 | 0.0 | 6       |
| 7 | 40.00      | 0.000              | 100.0 | 0.0   | 0.0 | 0.0 | 6       |

**Figure S31.** HPLC analysis of **7**. from the top to the bottom: ELSD detector, Photodiode Array Detector, Blank with Photodiode Array Detector and Mass detector (ESI), absorption spectra of the compound (left), Mass spectra of the compound (right) and gradient.

Sample Name: KSI1-083, Blanc-MeOH Solvents : A: H2O+0.1%AF; B: ACN+0.1%AF  
 Column: Hypersil Gold aQ 3µm (3 x 150mm) Injection Volume: 5.00 µl

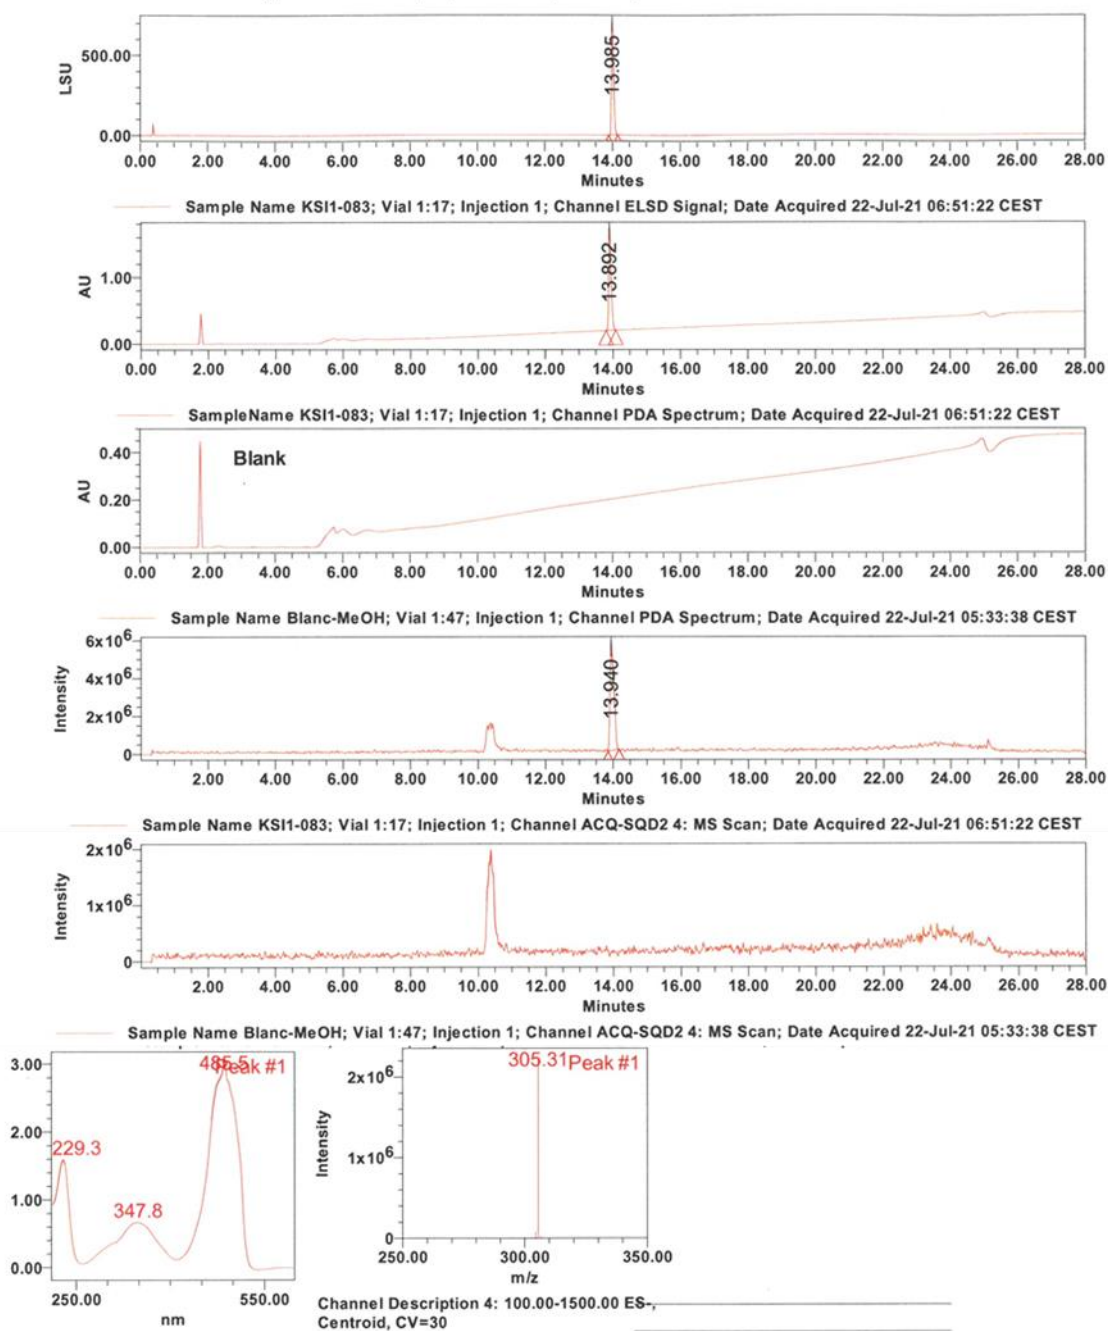

|   | Time (min) | Flow Rate (mL/min) | %A    | %B    | %C  | %D  | Curve   |
|---|------------|--------------------|-------|-------|-----|-----|---------|
| 1 | Initial    | 0.500              | 100.0 | 0.0   | 0.0 | 0.0 | Initial |
| 2 | 3.00       | 0.500              | 100.0 | 0.0   | 0.0 | 0.0 | 6       |
| 3 | 23.00      | 0.500              | 0.0   | 100.0 | 0.0 | 0.0 | 6       |
| 4 | 28.00      | 0.500              | 0.0   | 100.0 | 0.0 | 0.0 | 6       |
| 5 | 29.00      | 0.500              | 100.0 | 0.0   | 0.0 | 0.0 | 6       |
| 6 | 39.00      | 0.500              | 100.0 | 0.0   | 0.0 | 0.0 | 6       |
| 7 | 40.00      | 0.000              | 100.0 | 0.0   | 0.0 | 0.0 | 6       |

**Figure S32.** HPLC analysis of **5**. from the top to the bottom: ELSD detector, Photodiode Array Detector, Blank with Photodiode Array Detector, Mass detector (ESI<sup>-</sup>), Blank with Mass detector (ESI<sup>-</sup>), absorption spectra of the compound (left), Mass spectra of the compound (right) and gradient.

### UV-Visible Absorption and fluorescence Spectra

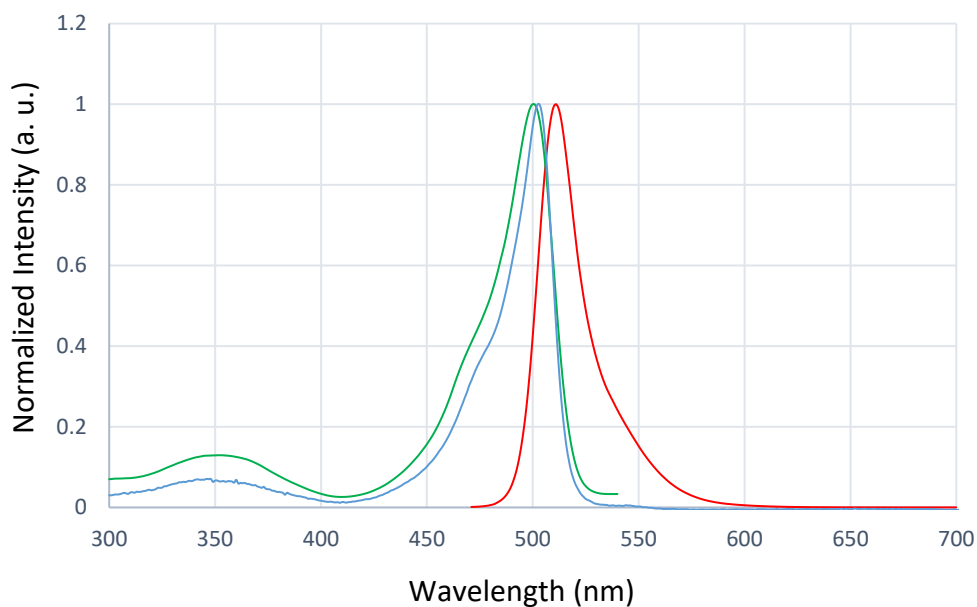

**Figure S33.** UV-Visible absorption Spectrum (blue) of **BCN<sub>10EE</sub>** [5.00  $\mu$ M] in Tris buffer 20mM pH:7.8, recorded on Varian Cary 100 spectrophotometer. Fluorescence excitation (green,  $\lambda_{em}$ = 350nm) and emission spectra (red,  $\lambda_{ex}$  = 450nm) of **BCN<sub>10EE</sub>** [2.50  $\mu$ M] in Tris buffer 20mM pH:7.8 at 25°C recorded on HITACI F-2500 spectrofluorometer.
